# Supplementary material for: A new fluorescent “turn-on” chemodosimeter for cyanide based on dual reversible and irreversible deprotonation of NH and CH groups
Source: Royal Society of Chemistry journal article supplement (doi:10.1039/c4nj01675k), 2015-01-01
Supplement: c4nj01675k1.pdf [file c4nj01675k1.pdf]

## Supporting Information for

### A Novel Fluorescent “Turn-On” Chemodosimeter for Cyanide Based on Dual Reversible and Irreversible Deprotonation of NH and CH Group

Chuanxiu Zhang,<sup>a, b</sup> Chuanxiang Liu,\*<sup>a</sup> Baiyun Li,<sup>a, b</sup> Jinju Chen,<sup>a</sup> Hua Zhang,\*<sup>a</sup> Zhou Hu<sup>a</sup> and  
Fengping Yi\*<sup>b</sup>

<sup>a</sup> School of Chemical and Environmental Engineering, Shanghai Institute of Technology, 201418  
Shanghai, China

<sup>b</sup> School of Perfume and Aroma Technology, Shanghai Institute of Technology, 201418 Shanghai,  
China

e-mail: cxliu@sit.edu.cn; yifengping@sit.edu.cn; zhanghua@sit.edu.cn

## Table of Contents

|                                                                                                                                      |     |
|--------------------------------------------------------------------------------------------------------------------------------------|-----|
| 1. <sup>1</sup> H, <sup>13</sup> C NMR, IR and HRMS-ESI copies of the compound <b>2</b> (Fig.S1-S4).....                             | S1  |
| 2. <sup>1</sup> H, <sup>13</sup> C NMR, IR and HRMS-ESI copies of the dosimeter <b>4</b> (Fig.S5-S8).....                            | S4  |
| 3. <sup>1</sup> H, <sup>13</sup> C NMR, IR and HRMS-ESI copies of the dosimeter <b>5</b> (Fig.S9-S12).....                           | S7  |
| 4. <sup>1</sup> H, <sup>13</sup> C NMR, IR and HRMS-ESI copies of the compound <b>6</b> (Fig.S13-S16).....                           | S10 |
| 5. <sup>1</sup> H, <sup>13</sup> C NMR, IR and HRMS-ESI copies of the compound <b>7</b> (Fig.S17-S20).....                           | S13 |
| 6. Interference experiments of <b>5</b> toward cyanide (Fig.S21).....                                                                | S16 |
| 7. The UV detection limit of the probe <b>5</b> with CN <sup>-</sup> (Fig.S22).....                                                  | S17 |
| 8. The UV detection limit of the probe <b>4</b> with CN <sup>-</sup> (Fig.S23).....                                                  | S18 |
| 9. UV-visible titration of <b>5</b> with Bu <sub>4</sub> N <sup>+</sup> CN <sup>-</sup> in CH <sub>3</sub> CN (Fig.S24).....         | S19 |
| 10. UV-visible titration of <b>4</b> with Bu <sub>4</sub> N <sup>+</sup> CN <sup>-</sup> in CH <sub>3</sub> CN (Fig.S25).....        | S20 |
| 11. Fluorescence spectra of <b>5</b> in the presence of different anions in CH <sub>3</sub> CN (Fig.S26).....                        | S21 |
| 12. Comparative table of this sensor with others (Table.S1).....                                                                     | S21 |
| 13. UV-visible titration of <b>7</b> with Bu <sub>4</sub> N <sup>+</sup> CN <sup>-</sup> in CH <sub>3</sub> CN (Fig.S27).....        | S21 |
| 14. The fluorescence detection limit of probe <b>5</b> with CN <sup>-</sup> (Fig.S28).....                                           | S23 |
| 15. Linear fluorescence response of probe <b>5</b> to CN <sup>-</sup> (Fig.S29).....                                                 | S24 |
| 16. Fluorescence spectra of compound <b>5</b> with NaCN in mixture solvents (Fig.S30).....                                           | S25 |
| 17. Fluorescence spectra of compound <b>5</b> with in Bu <sub>4</sub> N <sup>+</sup> CN <sup>-</sup> mixture solvents (Fig.S31)..... | S26 |
| 18. The pH-dependent behaviour of the probe <b>5</b> in different pH values (Fig.S32).....                                           | S27 |
| 19. Confocal microscopic images of RAW 264.7 Macrophages cells (Fig.S33).....                                                        | S28 |
| 20. The detailed <sup>1</sup> H NMR titration of <b>7</b> and <b>5</b> with F <sup>-</sup> (6–10 ppm) (Fig.S34).....                 | S29 |
| 21. The <sup>1</sup> H NMR titration of <b>5</b> with CN <sup>-</sup> (Fig.S35).....                                                 | S30 |
| 22. The <sup>1</sup> H NMR titration of <b>7</b> with CN <sup>-</sup> (Fig.S36).....                                                 | S31 |
| 23. The final state of compound <b>5</b> and <b>7</b> with F <sup>-</sup> and CN <sup>-</sup> (Fig.S37).....                         | S32 |

1.  $^1\text{H}$ ,  $^{13}\text{C}$  NMR, IR and HRMS-ESI copies of the compound 2.

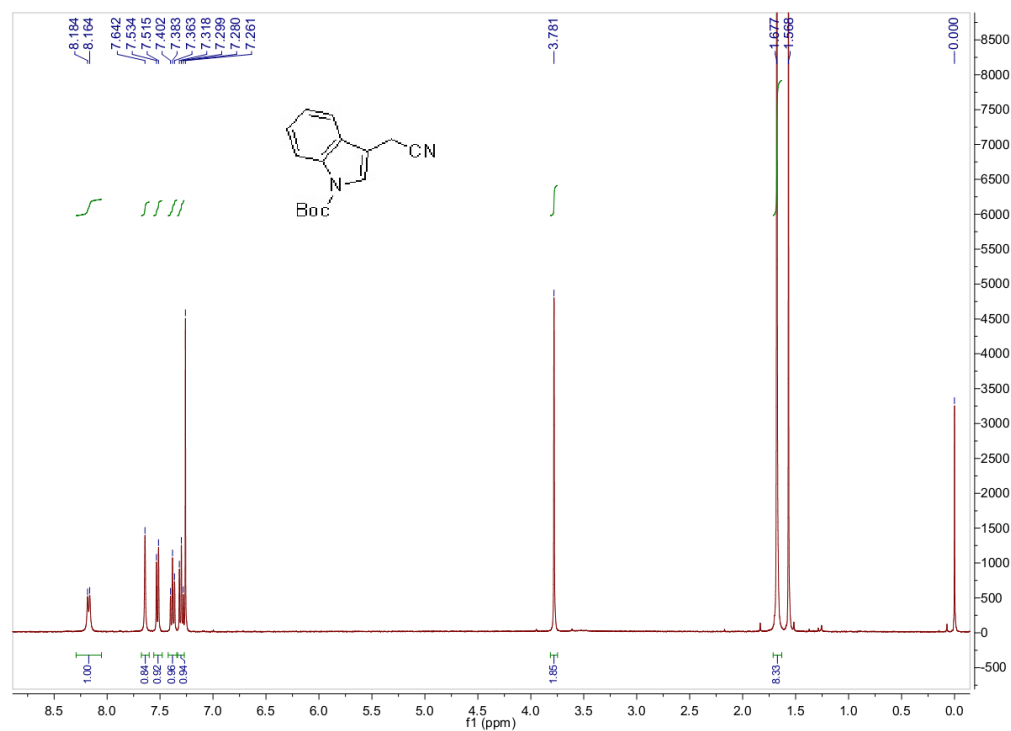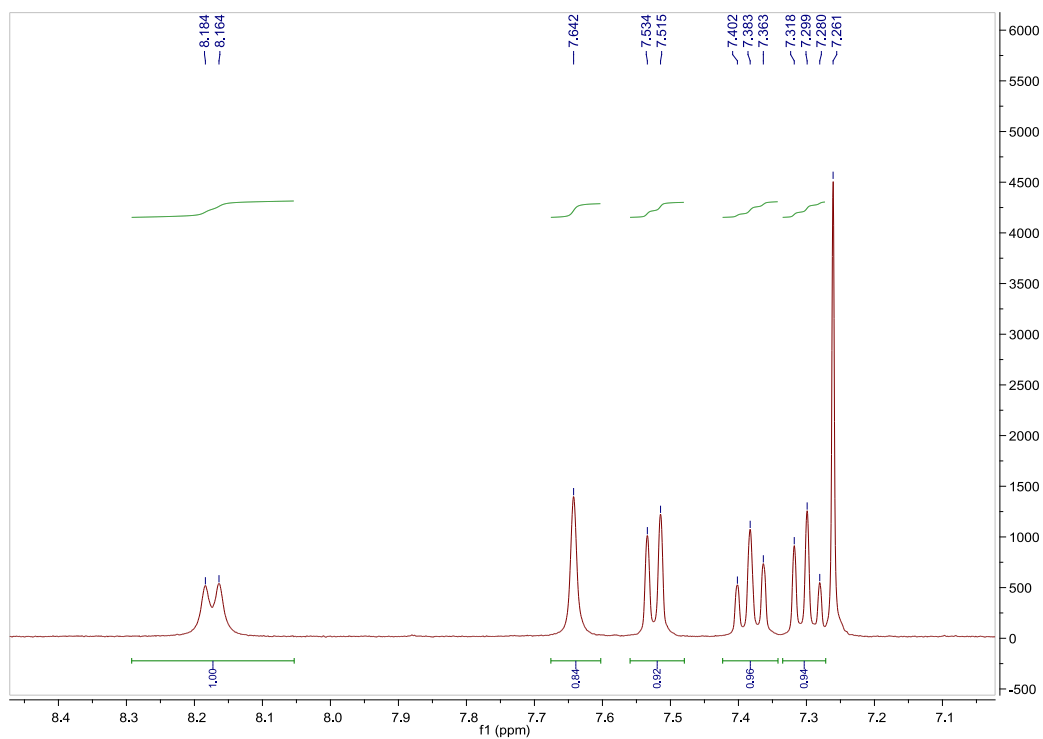

Fig. S1.  $^1\text{H}$  NMR ( $\text{CDCl}_3$ , 400 MHz) spectra of compound 2.

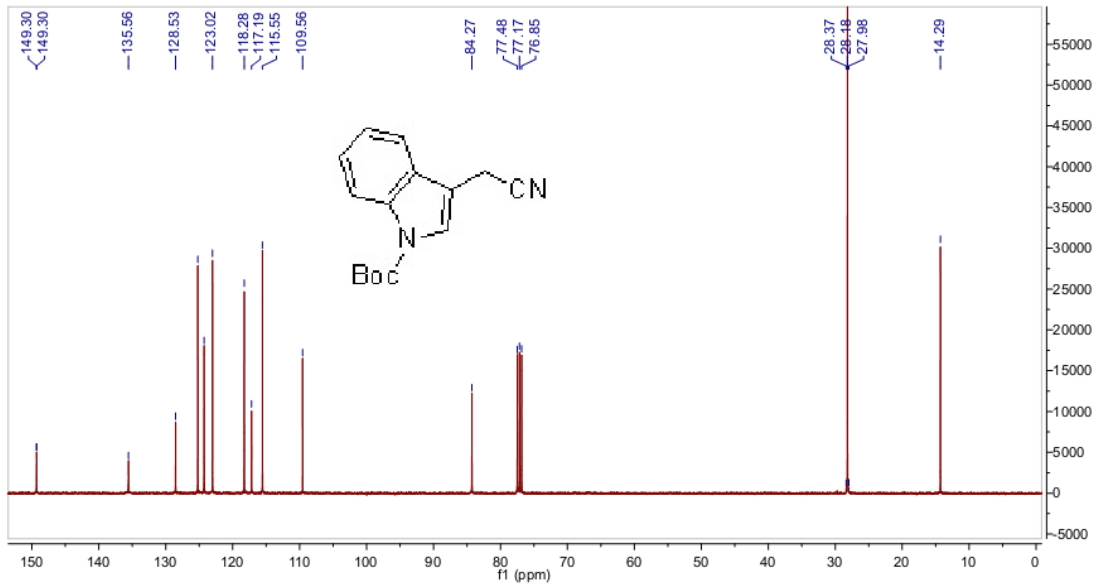

Fig. S2.  $^{13}\text{C}$  NMR (DMSO- $d_6$ , 100 MHz) spectra of compound 2.

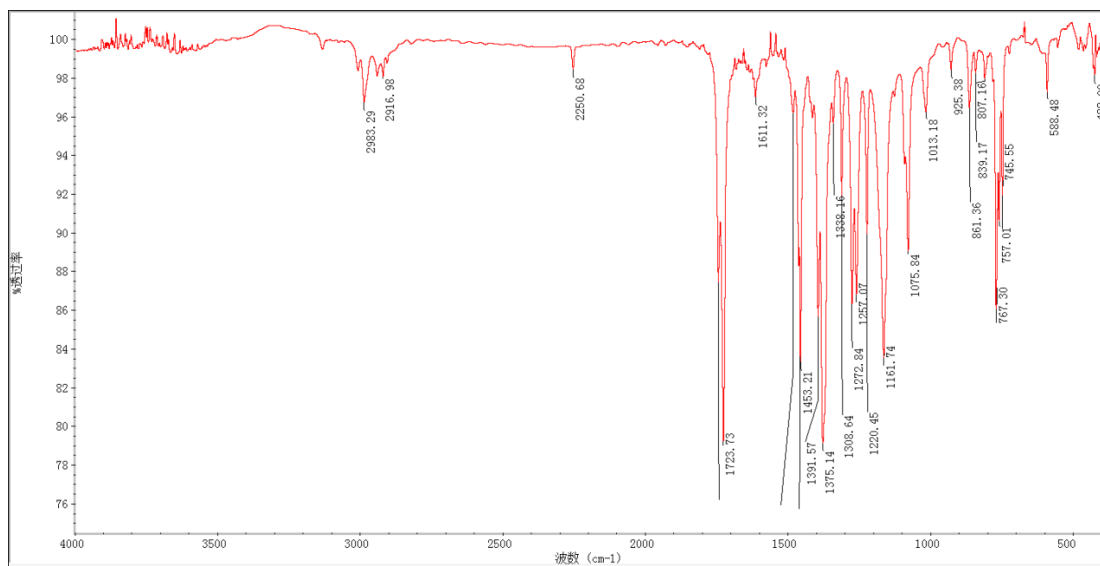

Fig. S3. IR spectra of compound 2.

## Mass Spectrum List Report

### Analysis Info

Analysis Name D:\Data\hyl\Method50\_1000\_000641.d  
 Method 4\_19\_MassAccuNeg  
 Sample Name 95 2  
 Comment

Acquisition Date 1/12/2014 7:13:36 PM

Operator  
 Instrument solariX

### Acquisition Parameter

|                          |            |                   |     |                       |                          |
|--------------------------|------------|-------------------|-----|-----------------------|--------------------------|
| Polarity                 | Positive   | n/a               | n/a | No. of Laser Shots    | 200                      |
| n/a                      | n/a        | No. of Cell Fills | 1   | Laser Power           | 20.0 lp                  |
| Broadband Low Mass       | 53.8 m/z   | n/a               | n/a | n/a                   | n/a                      |
| Broadband High Mass      | 1000.0 m/z | n/a               | n/a | n/a                   | n/a                      |
| Acquisition Mode         | Single MS  | n/a               | n/a |                       |                          |
| Pulse Program            | basic      | n/a               | n/a | Calibration Date      | Tue Jan 8 02:14:05 2013  |
| Source Accumulation      | 0.010 sec  | n/a               | n/a | Data Acquisition Size | 1048576                  |
| Ion Accumulation Time    | 0.200 sec  | n/a               | n/a | Apodization           | Sine-Bell Multiplication |
| Flight Time to Acq. Cell | 0.001 sec  | n/a               | n/a | Apodization           | Apodization              |

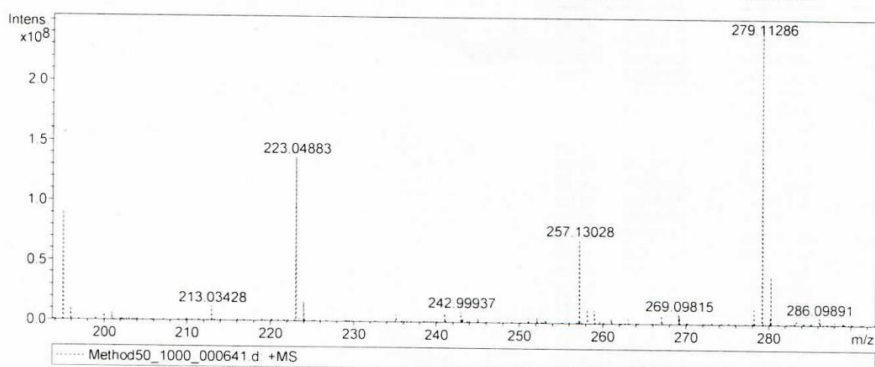

| m/z       | z | I         | Res.   |
|-----------|---|-----------|--------|
| 108.02675 |   | 14929178  | 178462 |
| 159.45604 |   | 12804844  | 98565  |
| 174.05474 |   | 9658163   | 98978  |
| 195.02328 |   | 91060976  | 85793  |
| 196.02673 |   | 10277756  | 85042  |
| 213.03428 |   | 12175473  | 77228  |
| 223.04531 |   | 9883213   | 123622 |
| 223.04883 |   | 137198672 | 70631  |
| 224.05224 |   | 16098314  | 69800  |
| 257.13028 |   | 69990152  | 59549  |
| 258.13369 |   | 12131103  | 59794  |
| 259.01842 |   | 11489305  | 59198  |
| 278.09886 |   | 14172003  | 55689  |
| 279.10744 |   | 17484222  | 69809  |
| 279.11286 |   | 244547008 | 54666  |
| 280.11634 |   | 41053980  | 54941  |
| 308.10664 |   | 21800516  | 46177  |
| 313.19416 |   | 26393118  | 46346  |
| 316.21504 |   | 10694091  | 44825  |
| 324.06946 |   | 10216936  | 57930  |
| 324.07662 |   | 43253996  | 61074  |
| 324.08434 |   | 630857984 | 44677  |
| 325.08782 |   | 133778040 | 44739  |
| 326.09125 |   | 13170176  | 42986  |

**Fig. S4.** ESI mass spectra of compound **2**.

2.  $^1\text{H}$ ,  $^{13}\text{C}$  NMR, IR and HRMS-ESI copies of the dosimeter 4

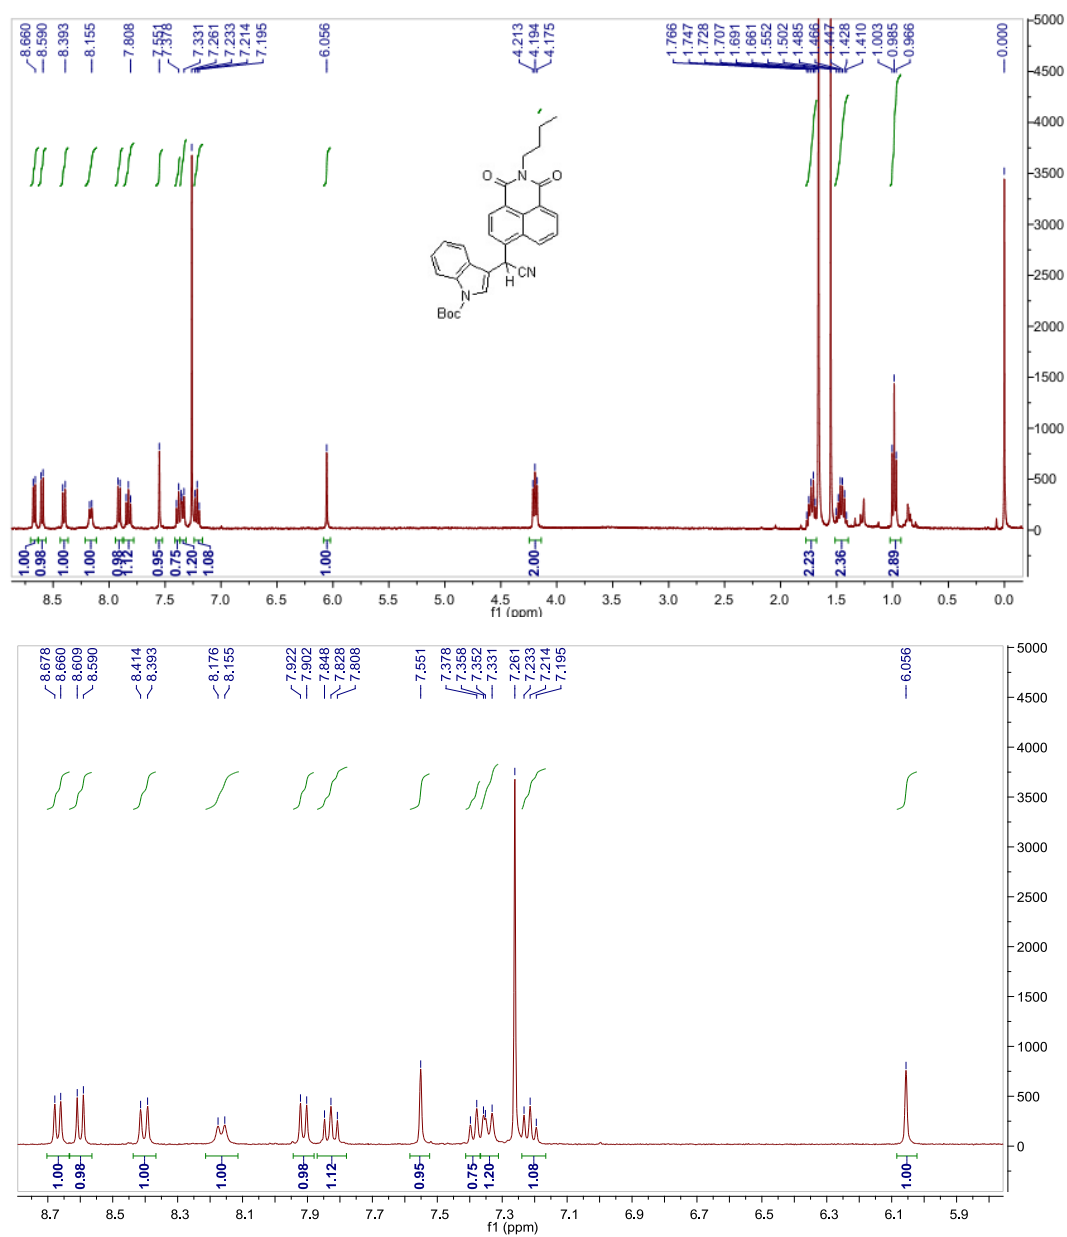

Fig. S5.  $^1\text{H}$  NMR ( $\text{CDCl}_3$ , 400 MHz) spectra of dosimeter 4.

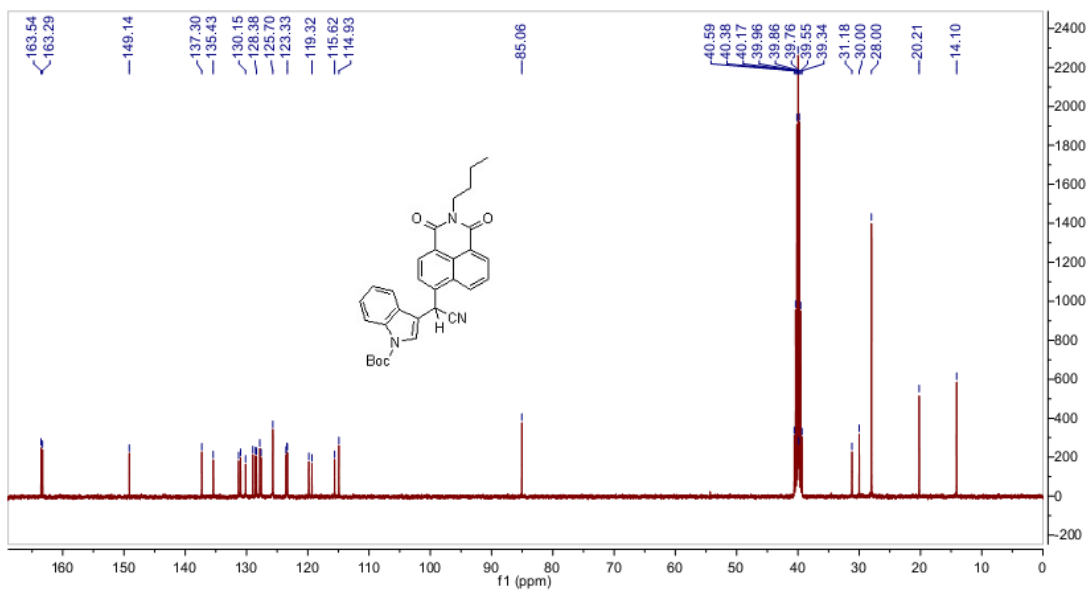

**Fig. S6.**  $^{13}\text{C}$  NMR (DMSO- $d_6$ , 100 MHz) spectra of dosimeter 4.

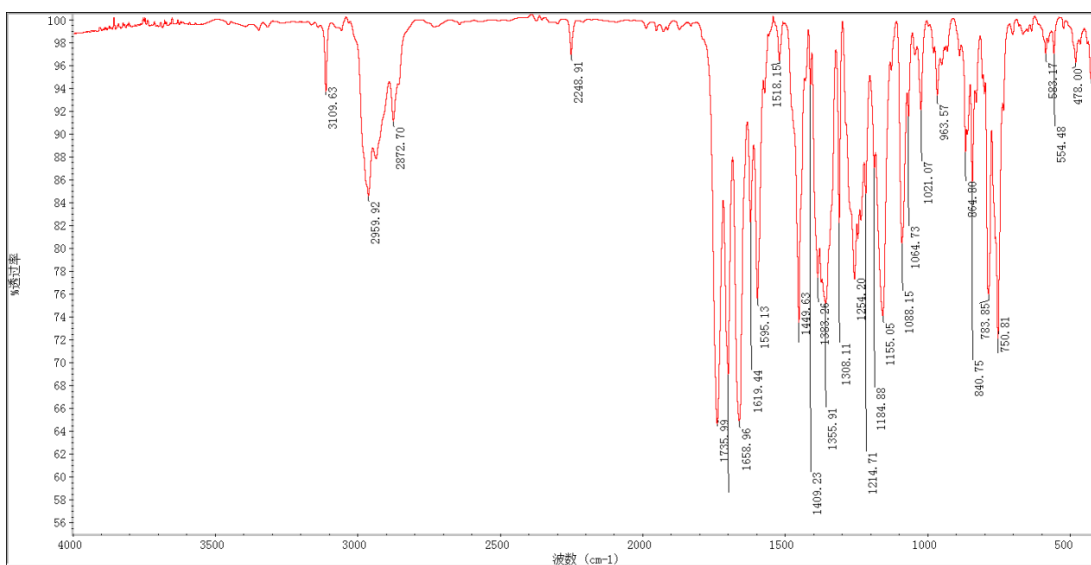

**Fig. S7.** IR spectra of dosimeter 4.

## Mass Spectrum List Report

### Analysis Info

Analysis Name D:\Data\hl\Method50\_1000\_000542.d  
 Method 4\_19\_MassAccuNeg  
 Sample Name 3  
 Comment

Acquisition Date 11/6/2013 4:29:22 PM

Operator  
 Instrument solarix

### Acquisition Parameter

|                          |            |                   |     |                       |                          |
|--------------------------|------------|-------------------|-----|-----------------------|--------------------------|
| Polarity                 | Positive   | n/a               | n/a | No. of Laser Shots    | 200                      |
| n/a                      | n/a        | No. of Cell Fills | 1   | Laser Power           | 20.0 Ip                  |
| Broadband Low Mass       | 53.8 m/z   | n/a               | n/a | n/a                   | n/a                      |
| Broadband High Mass      | 1000.0 m/z | n/a               | n/a | n/a                   | n/a                      |
| Acquisition Mode         | Single MS  | n/a               | n/a |                       |                          |
| Pulse Program            | basic      | n/a               | n/a | Calibration Date      | Tue Jan 8 02:14:05 2013  |
| Source Accumulation      | 0.010 sec  | n/a               | n/a | Data Acquisition Size | 1048576                  |
| Ion Accumulation Time    | 0.200 sec  | n/a               | n/a | Apodization           | Sine-Bell Multiplication |
| Flight Time to Acq. Cell | 0.001 sec  | n/a               | n/a | Apodization           | Apodization              |

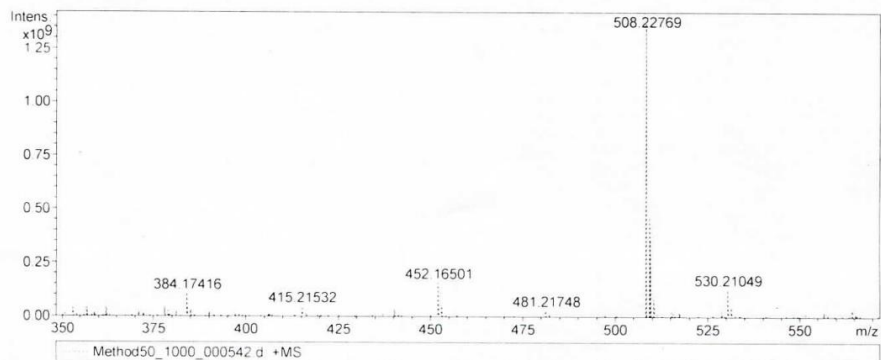

| m/z       | z | I         | Res.   |
|-----------|---|-----------|--------|
| 169.41104 |   | 38419920  | 104037 |
| 234.20670 |   | 17608852  | 67770  |
| 242.28464 |   | 13608340  | 67951  |
| 245.08746 |   | 17312574  | 66586  |
| 261.06546 |   | 46066160  | 58905  |
| 262.23864 |   | 28541882  | 58491  |
| 275.08159 |   | 11902311  | 56976  |
| 278.23400 |   | 18734024  | 57310  |
| 290.27062 |   | 232309584 | 51936  |
| 291.27396 |   | 35576108  | 52574  |
| 301.12021 |   | 25117170  | 48732  |
| 306.26563 |   | 18819096  | 49462  |
| 313.27549 |   | 45407292  | 47054  |
| 318.30209 |   | 58993304  | 46254  |
| 328.10975 |   | 10848316  | 46253  |
| 331.28616 |   | 15654663  | 44730  |
| 333.61177 |   | 17399304  | 43653  |
| 334.29722 |   | 125242496 | 44589  |
| 335.30037 |   | 24744620  | 44265  |
| 341.30727 |   | 21226426  | 43264  |
| 346.33378 |   | 22328502  | 43338  |
| 351.11357 |   | 11633705  | 42705  |
| 353.26863 |   | 36937180  | 41664  |
| 357.18347 |   | 40895064  | 40598  |

**Fig. S8.** ESI mass spectra of dosimeter 4.

### 3. $^1\text{H}$ , $^{13}\text{C}$ NMR, IR and HRMS-ESI copies of the dosimeter 5

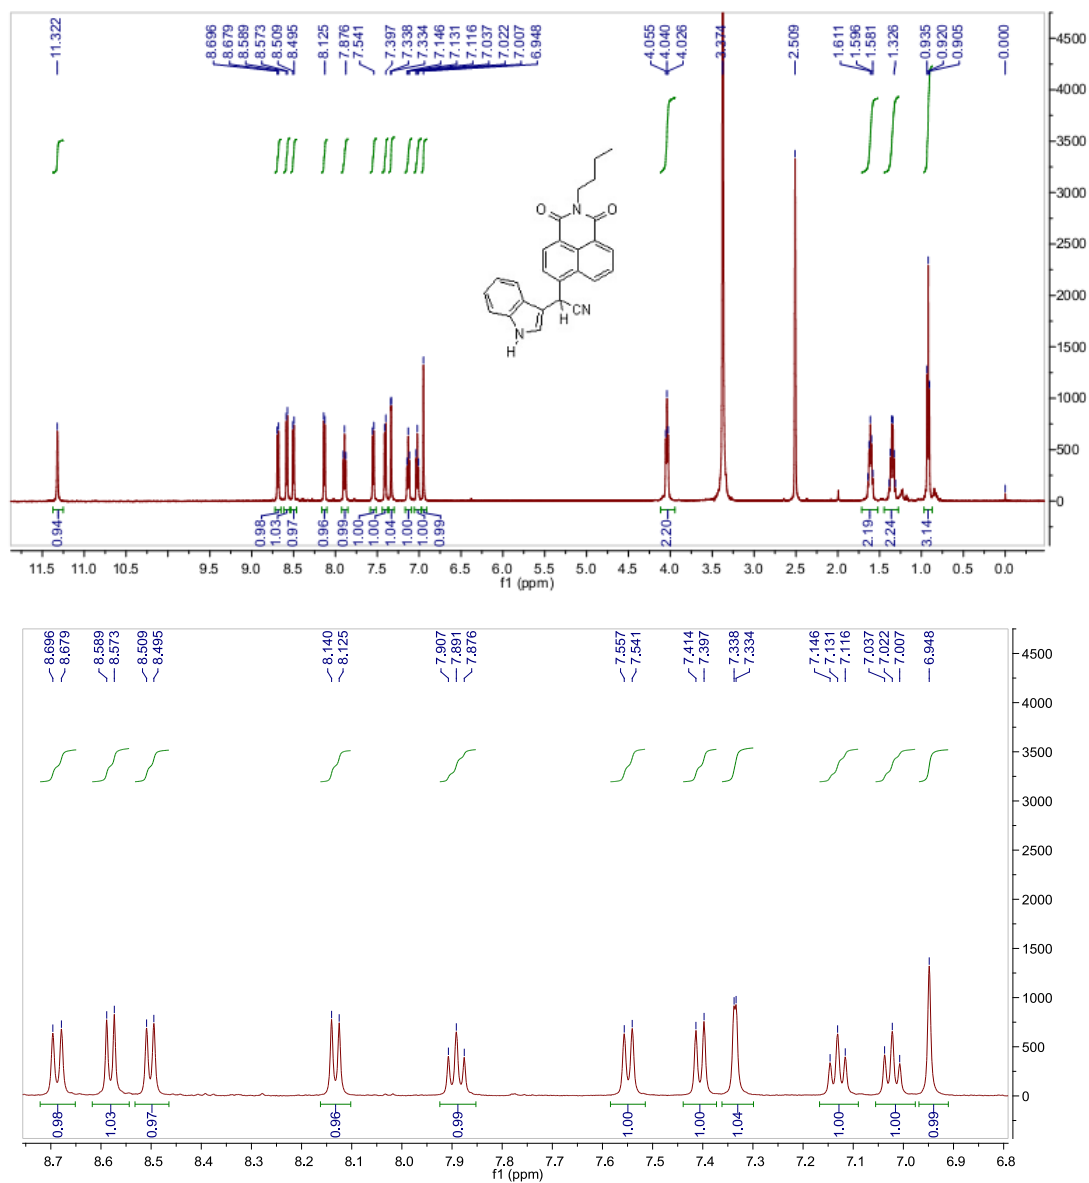

Fig. S9.  $^1\text{H}$  NMR ( $\text{DMSO-}d_6$ , 500 MHz) spectra of dosimeter 5.



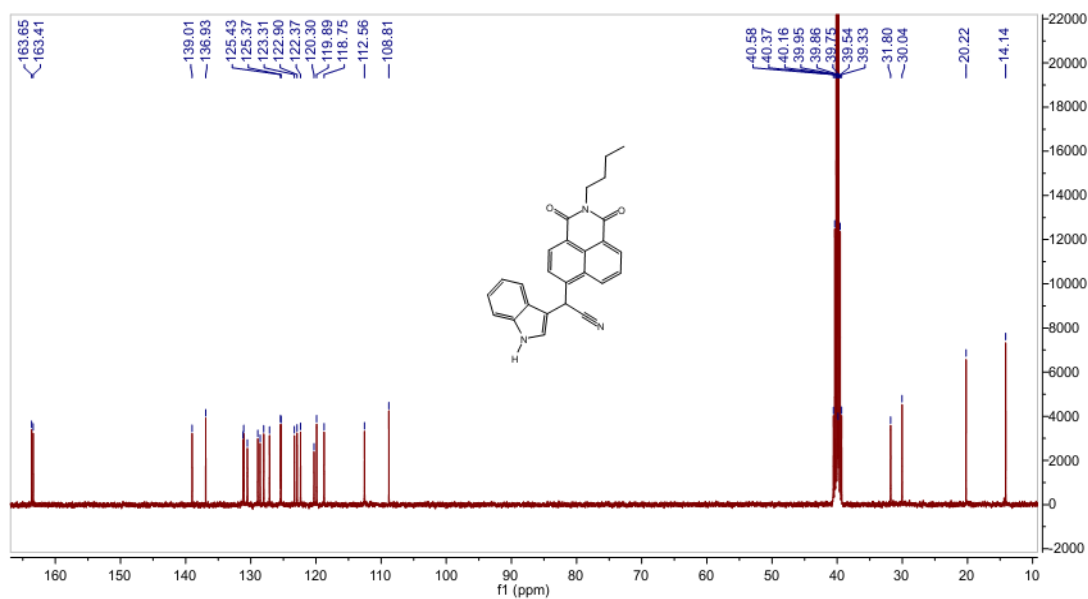

**Fig. S10.**  $^{13}\text{C}$  NMR (DMSO- $d_6$ , 100 MHz) spectra of dosimeter 5.

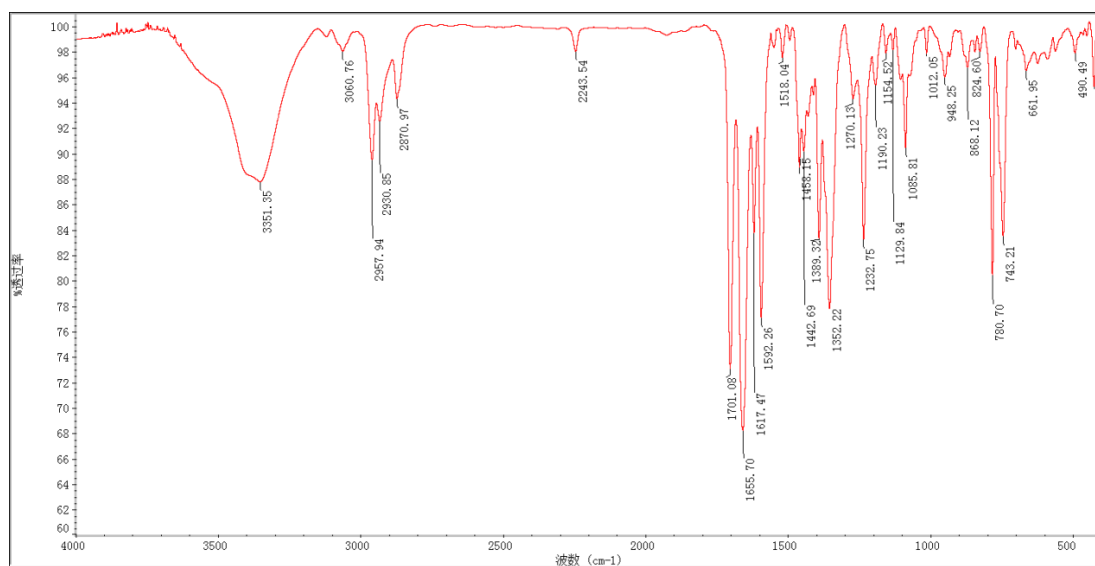

**Fig. S11.** IR spectra of dosimeter 5.

## Mass Spectrum List Report

**Analysis Info**

Analysis Name D:\Data\hy\Method50\_1000\_000543.d  
 Method 4\_19\_MassAccuNeg  
 Sample Name 3  
 Comment

Acquisition Date 11/6/2013 4:32:20 PM

Operator  
 Instrument solarix

**Acquisition Parameter**

|                          |            |                   |     |                       |                          |
|--------------------------|------------|-------------------|-----|-----------------------|--------------------------|
| Polarity                 | Positive   | n/a               | n/a | No. of Laser Shots    | 200                      |
| n/a                      | n/a        | No. of Cell Fills | 1   | Laser Power           | 20.0 Ip                  |
| Broadband Low Mass       | 53.8 m/z   | n/a               | n/a | n/a                   | n/a                      |
| Broadband High Mass      | 1000.0 m/z | n/a               | n/a | n/a                   | n/a                      |
| Acquisition Mode         | Single MS  | n/a               | n/a | Calibration Date      | Tue Jan 8 02:14:05 2013  |
| Pulse Program            | basic      | n/a               | n/a | Data Acquisition Size | 1048576                  |
| Source Accumulation      | 0.010 sec  | n/a               | n/a | Apodization           | Sine-Bell Multiplication |
| Ion Accumulation Time    | 0.200 sec  | n/a               | n/a | Apodization           | Apodization              |
| Flight Time to Acq. Cell | 0.001 sec  | n/a               | n/a |                       |                          |

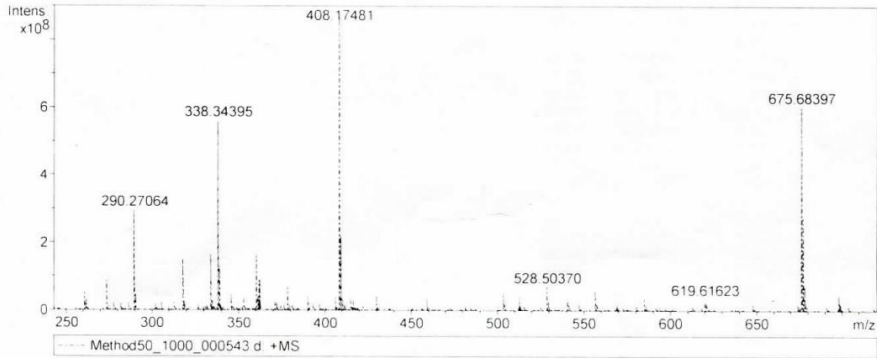

| m/z       | z | I         | Res.   |
|-----------|---|-----------|--------|
| 136.05796 |   | 15992886  | 140450 |
| 234.20668 |   | 18767520  | 69157  |
| 242.28469 |   | 45517596  | 66044  |
| 261.06541 |   | 53432144  | 59994  |
| 262.23868 |   | 35828124  | 58726  |
| 274.27541 |   | 88077472  | 56504  |
| 278.23391 |   | 21556706  | 56923  |
| 282.28054 |   | 24240928  | 54988  |
| 287.21355 |   | 20749252  | 53531  |
| 290.27064 |   | 297158912 | 51968  |
| 291.27395 |   | 49805000  | 52699  |
| 302.30718 |   | 21966778  | 49202  |
| 306.26575 |   | 25646234  | 49724  |
| 313.27566 |   | 25702160  | 48273  |
| 318.30216 |   | 148867664 | 46245  |
| 319.30549 |   | 29180466  | 47991  |
| 327.20344 |   | 15398042  | 45413  |
| 332.28168 |   | 15467297  | 42150  |
| 334.29732 |   | 165022320 | 43741  |
| 335.30088 |   | 32063658  | 43935  |
| 338.34395 |   | 563168128 | 43420  |
| 339.34729 |   | 132560328 | 43427  |
| 346.33400 |   | 51510872  | 42406  |
| 350.29262 |   | 15287574  | 42570  |

**Fig. S12.** ESI mass spectra of dosimeter 5.

4.  $^1\text{H}$ ,  $^{13}\text{C}$  NMR, IR and HRMS-ESI copies of the compound 6.

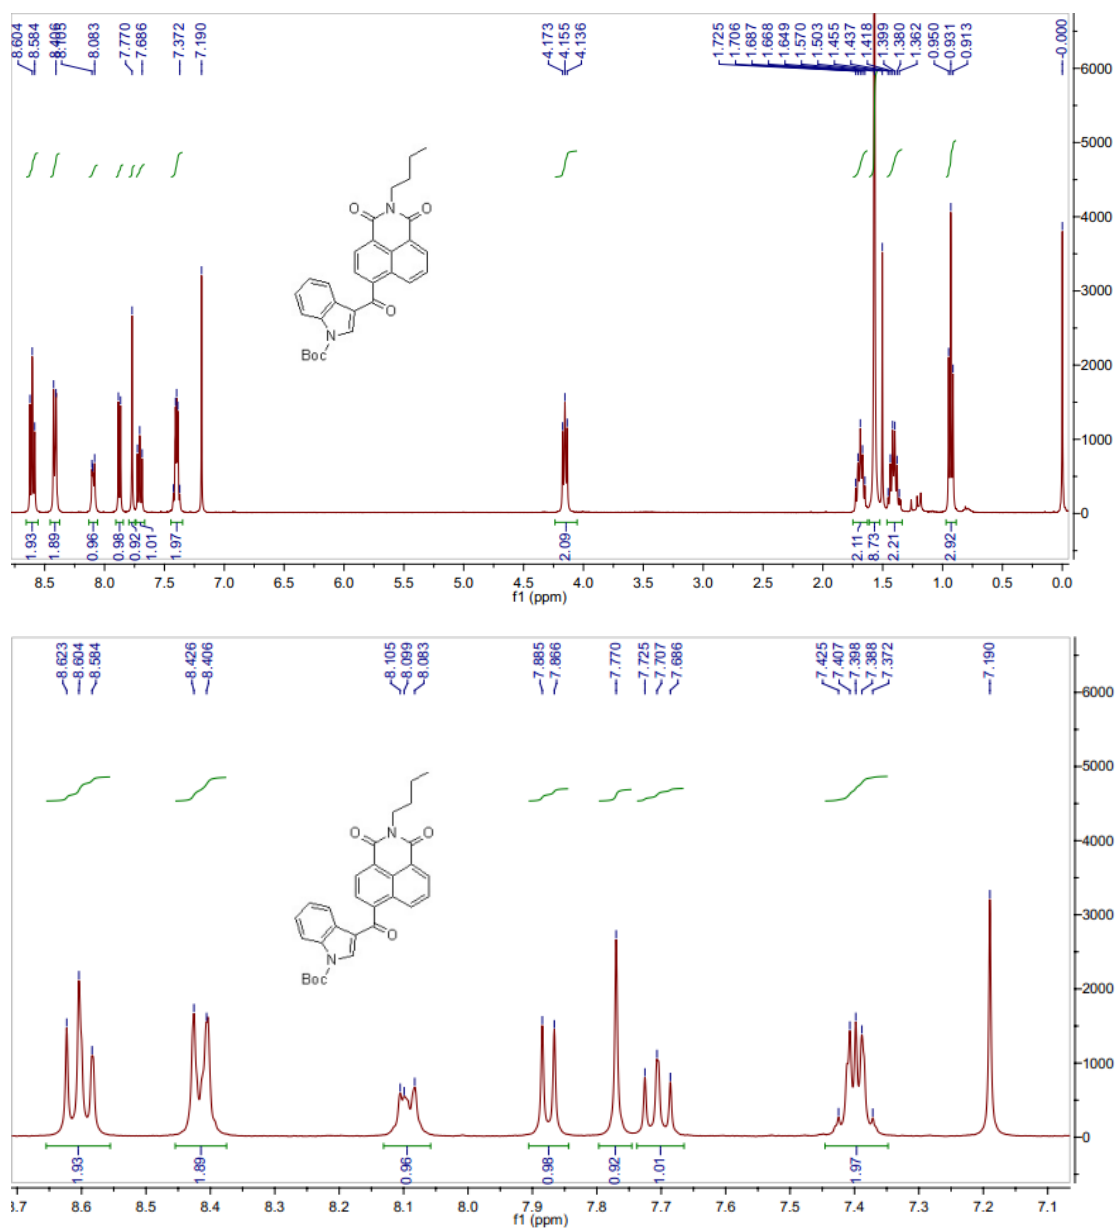

Fig. S13.  $^1\text{H}$  NMR ( $\text{CDCl}_3$ , 400 MHz) spectra of compound 6.

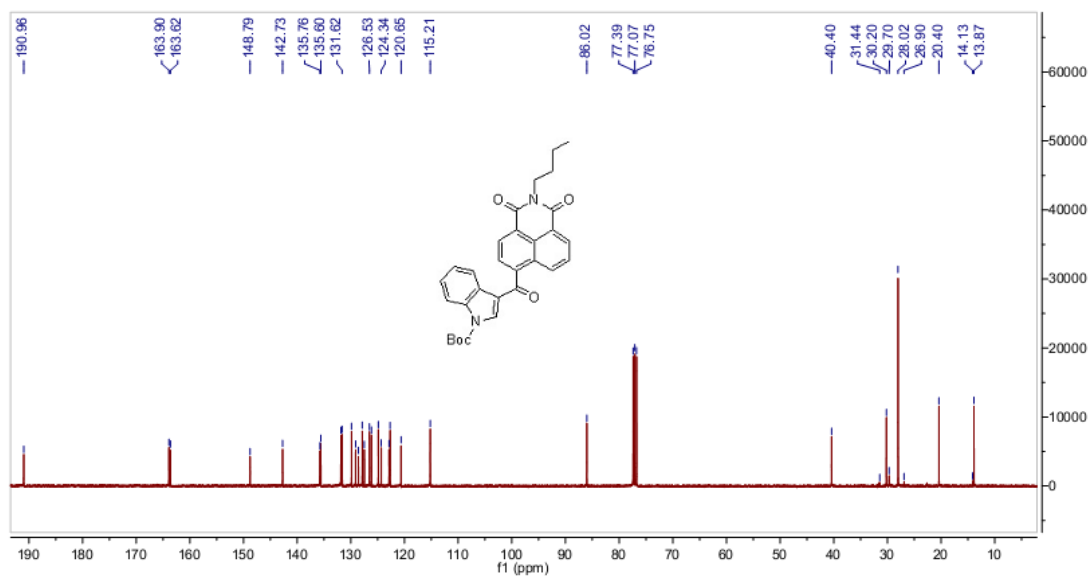

**Fig. S14.**  $^{13}\text{C}$  NMR (DMSO- $d_6$ , 100 MHz) spectra of compound **6**.

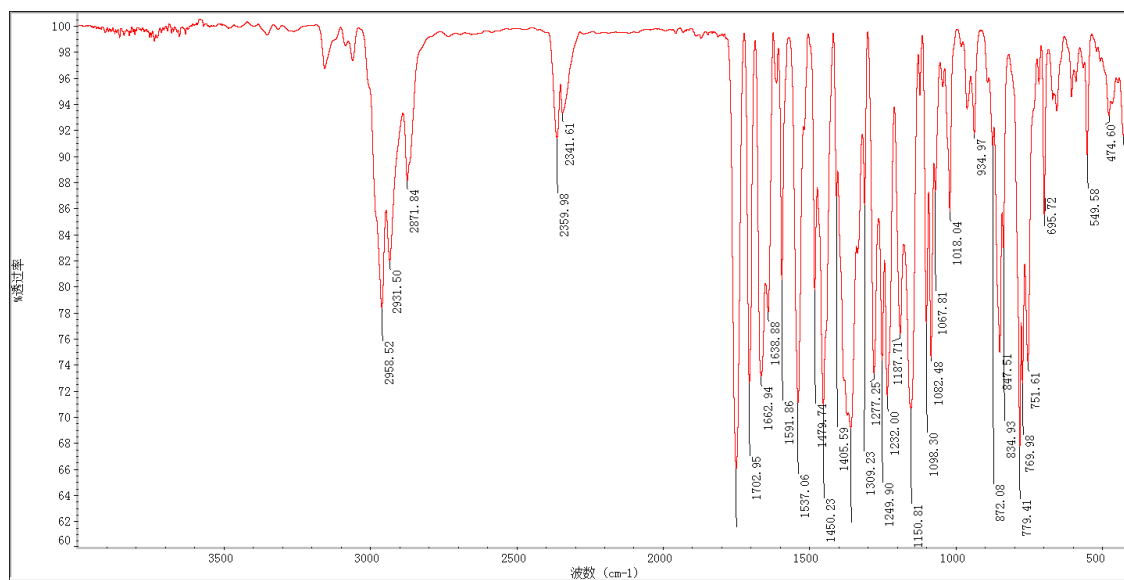

**Fig. S15.** IR spectra of compound **6**.

## Mass Spectrum List Report

|                      |                         |                  |                     |
|----------------------|-------------------------|------------------|---------------------|
| <b>Analysis Info</b> |                         | Acquisition Date | 6/3/2014 4:54:23 PM |
| Analysis Name        | D:\Data\ZYLCJJ_000036.d | Operator         |                     |
| Method               | 4_19_MassAccuNeg        | Instrument       | solarix             |
| Sample Name          | NaTFA                   |                  |                     |
| Comment              |                         |                  |                     |

|                              |            |                   |     |                       |                          |
|------------------------------|------------|-------------------|-----|-----------------------|--------------------------|
| <b>Acquisition Parameter</b> |            |                   |     | No. of Laser Shots    | 200                      |
| Polarity                     | Positive   | n/a               | n/a | Laser Power           | 20.0 lp                  |
| n/a                          | n/a        | No. of Cell Fills | 1   | n/a                   | n/a                      |
| Broadband Low Mass           | 53.8 m/z   | n/a               | n/a | n/a                   | n/a                      |
| Broadband High Mass          | 1200.0 m/z | n/a               | n/a |                       |                          |
| Acquisition Mode             | Single MS  | n/a               | n/a | Calibration Date      | Fri Feb 21 02:36:54 2014 |
| Pulse Program                | basic      | n/a               | n/a | Data Acquisition Size | 1048576                  |
| Source Accumulation          | 0.010 sec  | n/a               | n/a | Apodization           | Sine-Bell Multiplication |
| Ion Accumulation Time        | 0.200 sec  | n/a               | n/a | Apodization           | Apodization              |
| Flight Time to Acq. Cell     | 0.001 sec  | n/a               | n/a |                       |                          |

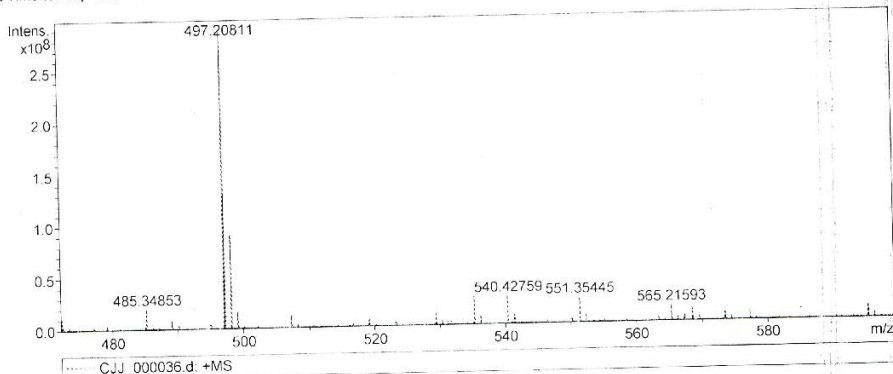

| m/z       | z | I         | Res.   |
|-----------|---|-----------|--------|
| 157.45187 |   | 11513903  | 109067 |
| 165.73875 |   | 9311901   | 114822 |
| 261.05937 |   | 30511410  | 101238 |
| 261.06409 |   | 376113472 | 59618  |
| 262.06738 |   | 32451198  | 60645  |
| 275.08003 |   | 58617804  | 52381  |
| 279.05375 |   | 19813714  | 56485  |
| 282.27917 |   | 13236452  | 53010  |
| 285.03130 |   | 18594012  | 52268  |
| 287.02810 |   | 9878214   | 54185  |
| 300.19870 |   | 13634037  | 51850  |
| 316.21177 |   | 16552447  | 45654  |
| 325.05939 |   | 30607434  | 43178  |
| 338.34170 |   | 68011648  | 43205  |
| 339.07503 |   | 15579393  | 43645  |
| 339.34492 |   | 14382479  | 44770  |
| 362.29762 |   | 12409971  | 42003  |
| 367.09667 |   | 15062013  | 70219  |
| 367.10634 |   | 172827648 | 38021  |
| 368.10983 |   | 28071992  | 38973  |
| 369.16970 |   | 15158669  | 36446  |
| 371.28098 |   | 20687158  | 37338  |
| 383.24701 |   | 24846236  | 33407  |
| 387.18099 |   | 35045952  | 32556  |

**Fig. S16.** ESI mass spectra of compound **6**.

5.  $^1\text{H}$ ,  $^{13}\text{C}$  NMR, IR and HRMS-ESI copies of the compound 7.

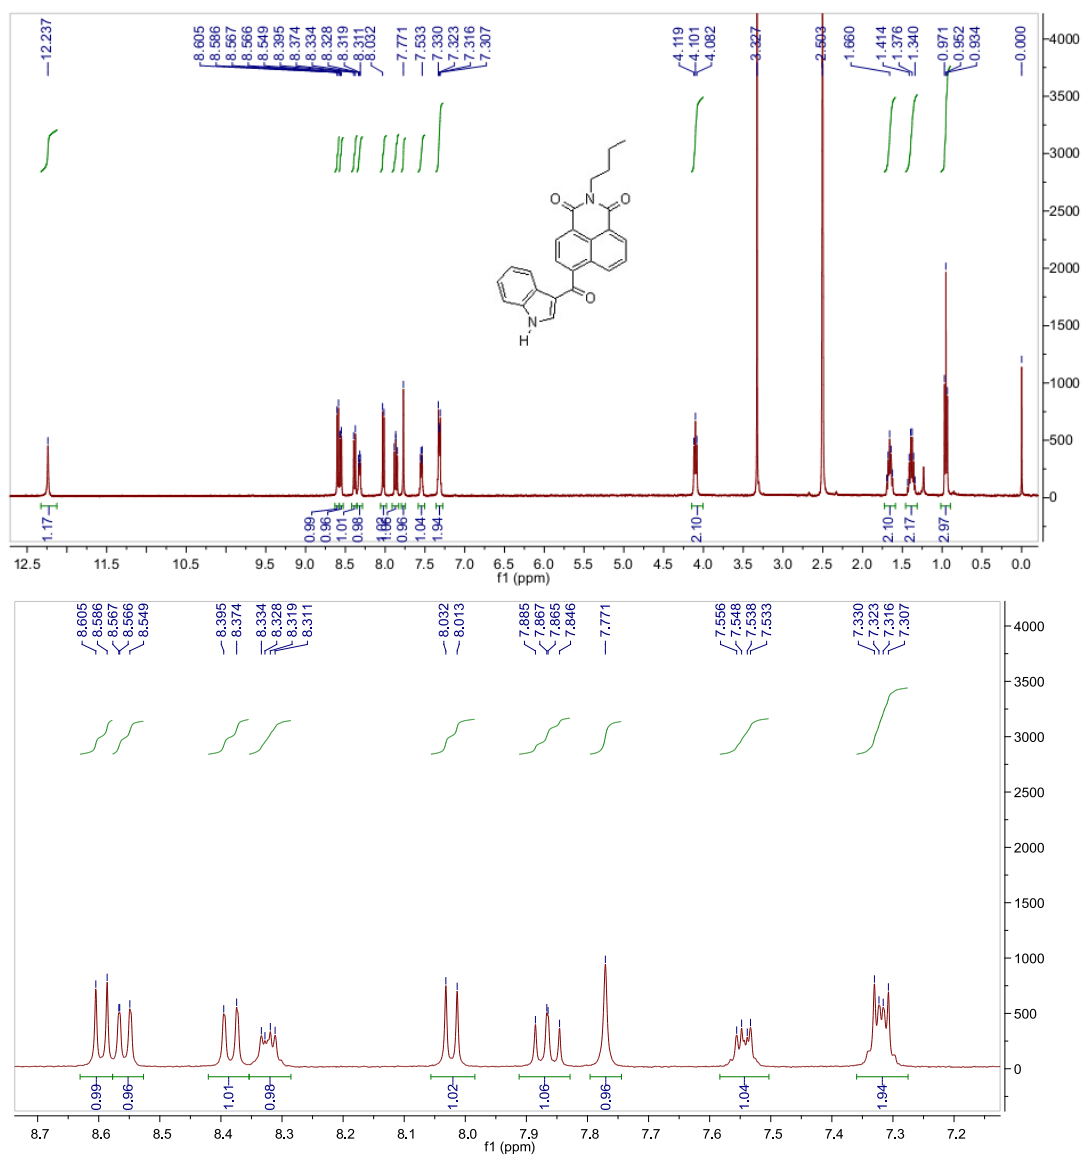

**Fig. S17.**  $^1\text{H}$  NMR ( $\text{CDCl}_3$ , 400 MHz) spectra of compound 7.

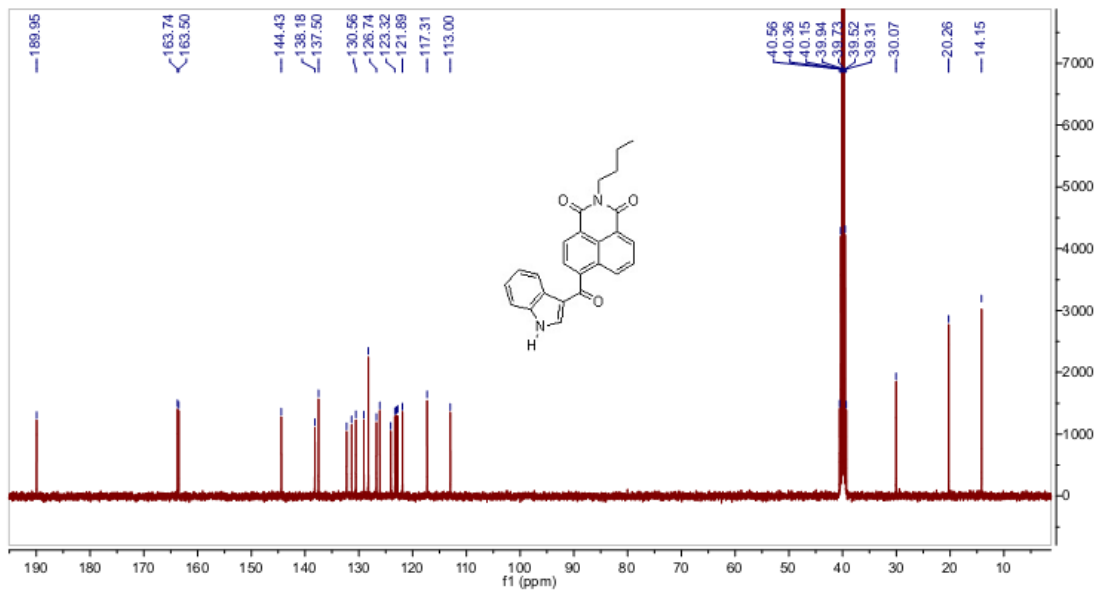

**Fig. S18.**  $^{13}\text{C}$  NMR (DMSO- $d_6$ , 100 MHz) spectra of compound **7**

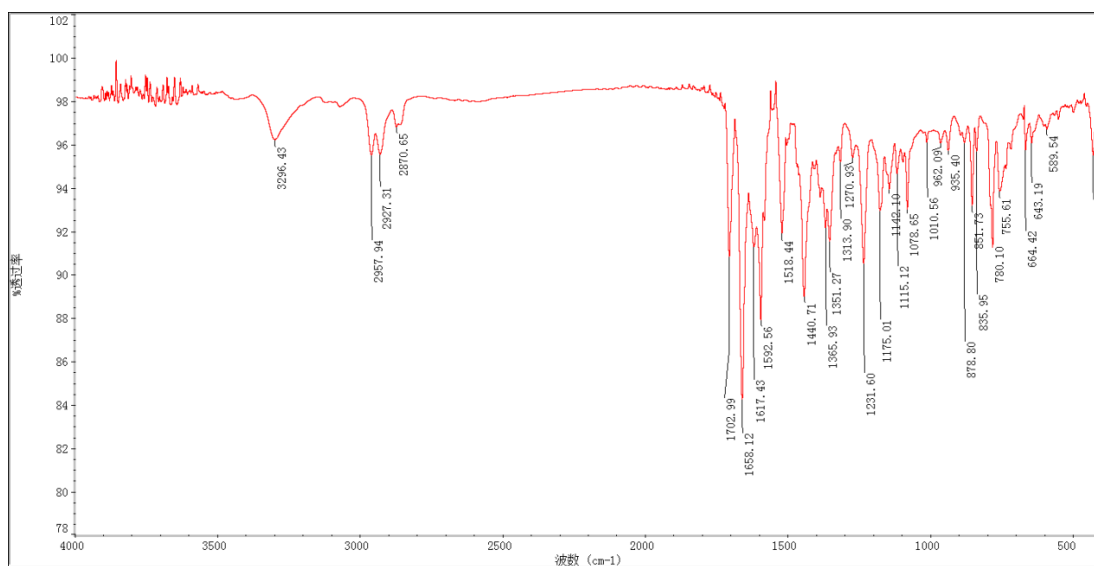

**Fig. S19.** IR spectra of compound **7**

# Mass Spectrum List Report

## Analysis Info

Analysis Name D:\Data\ZYLICJJ\_000026.d  
 Method 4\_19\_MassAccuNeg  
 Sample Name NaTFA  
 Comment

Acquisition Date 4/24/2014 1:10:33 PM

Operator  
 Instrument solariX

## Acquisition Parameter

|                          |            |                   |     |                       |                          |
|--------------------------|------------|-------------------|-----|-----------------------|--------------------------|
| Polarity                 | Positive   | n/a               | n/a | No. of Laser Shots    | 200                      |
| n/a                      | n/a        | No. of Cell Fills | 1   | Laser Power           | 20.0 lp                  |
| Bandband Low Mass        | 53.8 m/z   | n/a               | n/a | n/a                   | n/a                      |
| Bandband High Mass       | 1200.0 m/z | n/a               | n/a | n/a                   | n/a                      |
| Acquisition Mode         | Single MS  | n/a               | n/a | Calibration Date      | Fri Feb 21 02:36:54 2014 |
| Pulse Program            | basic      | n/a               | n/a | Data Acquisition Size | 1048576                  |
| Source Accumulation      | 0.010 sec  | n/a               | n/a | Apodization           | Sine-Bell Multiplication |
| Ion Accumulation Time    | 0.200 sec  | n/a               | n/a | Apodization           | Apodization              |
| Flight Time to Acq. Cell | 0.001 sec  | n/a               | n/a |                       |                          |

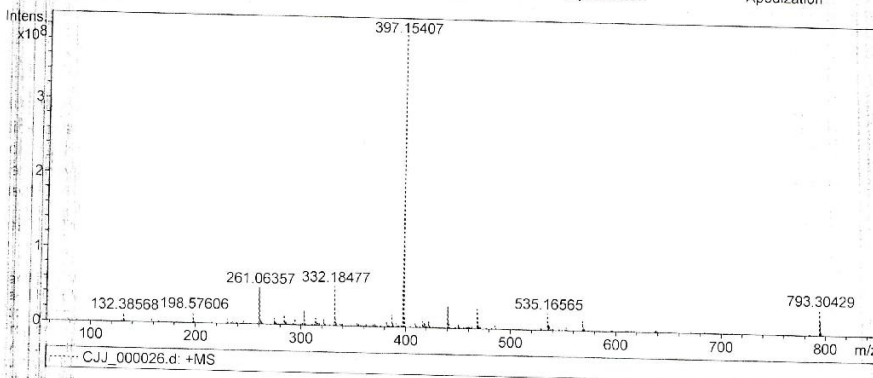

| m/z       | z | I        | Res.   |
|-----------|---|----------|--------|
| 132.38568 |   | 11626266 | 138945 |
| 158.77817 |   | 3380649  | 60870  |
| 198.57606 |   | 14399388 | 86862  |
| 198.57874 |   | 7347356  | 90943  |
| 198.58130 |   | 2976861  | 102006 |
| 199.07766 |   | 3634269  | 87905  |
| 231.06398 |   | 6031502  | 69414  |
| 238.22368 |   | 3977453  | 69591  |
| 248.06376 |   | 3864465  | 67264  |
| 261.06357 |   | 49759772 | 61176  |
| 262.06698 |   | 4915223  | 61518  |
| 263.09926 |   | 4114455  | 61345  |
| 275.07931 |   | 8288082  | 57924  |
| 278.59891 |   | 2574379  | 59632  |
| 284.59629 |   | 13249763 | 54940  |
| 285.09832 |   | 5747763  | 59520  |
| 285.59483 |   | 5251074  | 55683  |
| 288.17936 |   | 4150880  | 54423  |
| 293.10799 |   | 2625682  | 54649  |
| 295.08745 |   | 8835277  | 54211  |
| 302.05383 |   | 3253227  | 54075  |
| 303.19472 |   | 19620812 | 51265  |
| 304.19789 |   | 4157205  | 50467  |
| 314.17429 |   | 10368756 | 49619  |

Bruker Compass DataAnalysis 4.0

printed: 4/24/2014 4:52:43 PM

Page 1 of 2

**Fig. S20.** ESI mass spectra of compound 7



## 6. Interference experiments of **5** toward cyanide.

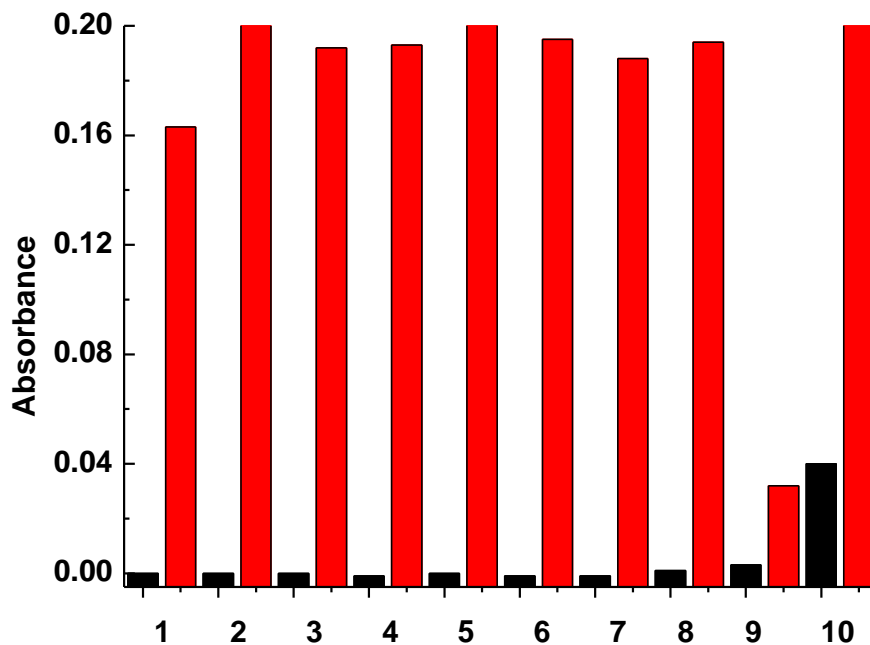

**Fig. S21** Absorbance responses of **5** toward cyanide and other anions (30 eq, from left to right:  $\text{HSO}_4^-$ ,  $\text{H}_2\text{PO}_4^-$ ,  $\text{Cl}^-$ ,  $\text{Br}^-$ ,  $\text{I}^-$ ,  $\text{NO}_3^-$ ,  $\text{BF}_4^-$ ,  $\text{ClO}_4^-$ ,  $\text{AcO}^-$ ,  $\text{F}^-$ ) in  $\text{CH}_3\text{CN}/\text{H}_2\text{O}$  (9:1, v/v). Black and red bars represent the absorbance of **5** ( $20 \mu\text{M}$ ) in the presence of various analytes before and after addition of  $\text{CN}^-$ , respectively.

7. The UV detection limit of the probe 5 with CN<sup>-</sup>.

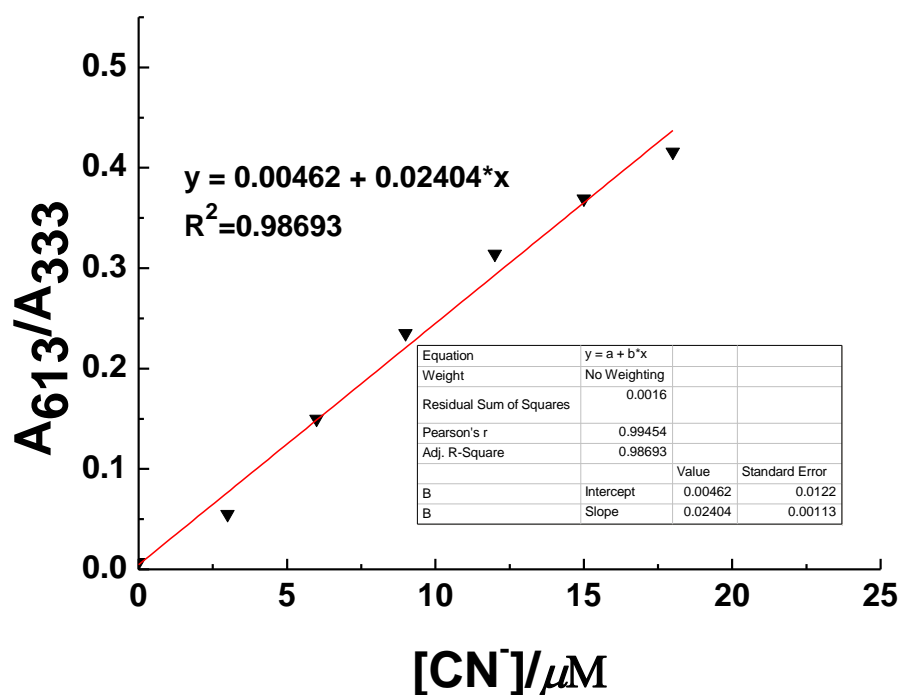

**Fig. S22.** Absorbance intensity ratio ( $A_{610}/A_{333}$ ) of dosimeter **5** ( $20 \mu\text{M}$ ) as a function of CN<sup>-</sup> concentration from 0-  $42 \mu\text{M}$  (0–2.1 equiv),

|         |   |
|---------|---|
| SD      | N |
| 0.01791 | 7 |

The result of the analysis as follows:

Linear Equation :  $y = 0.00462 + 0.02404 * x$ ,  $R^2 = 0.98693$

$S = 2.404 * 10^4$ ,  $K = 3$ ,  $\delta = 0.01791$

$\text{LOD} = K * \delta/S = 2.235 \mu\text{M}$

8. The UV detection limit of the probe 4 with CN<sup>-</sup>.

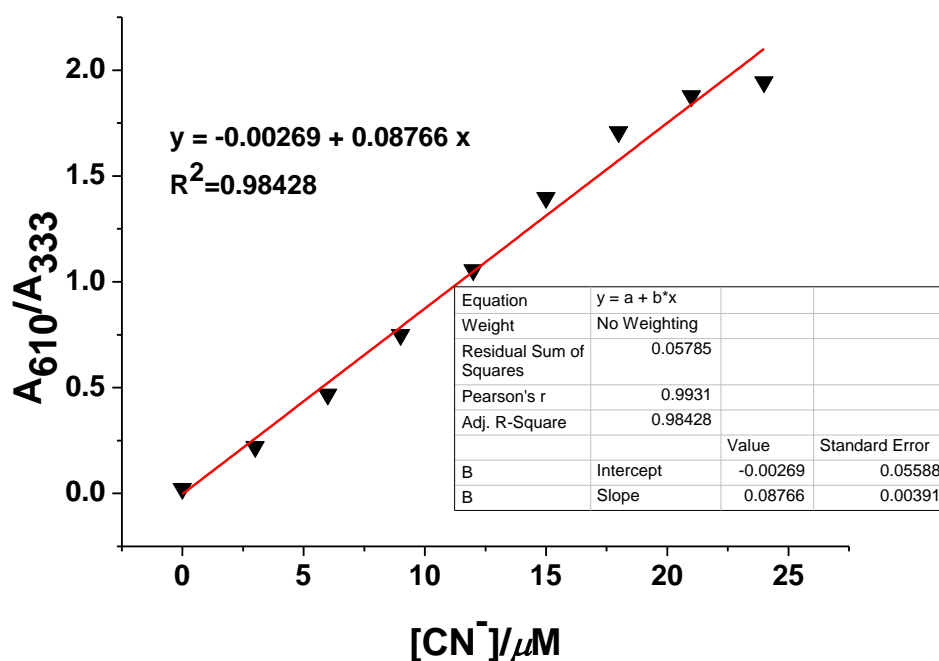

**Fig. S23.** Absorbance intensity ratio ( $A_{610}/A_{333}$ ) of dosimeter 4 ( $20 \mu\text{M}$ ) as a function of  $\text{CN}^-$  concentration from 0-  $27 \mu\text{M}$  (0–1.35 equiv),

|         |   |
|---------|---|
| SD      | N |
| 0.09091 | 9 |

The result of the analysis as follows:

Linear Equation :  $y = -0.00269 + 0.08766 * x$ ,  $R^2 = 0.98428$

$S = 8.766 * 10^{-4}$ ,  $K = 3$ ,  $\delta = 0.09091$

$\text{LOD} = K * \delta/S = 3.11 \mu\text{M}$

9. UV-visible titration of 5 with  $\text{Bu}_4\text{N}^+\text{CN}^-$  in  $\text{CH}_3\text{CN}$ .

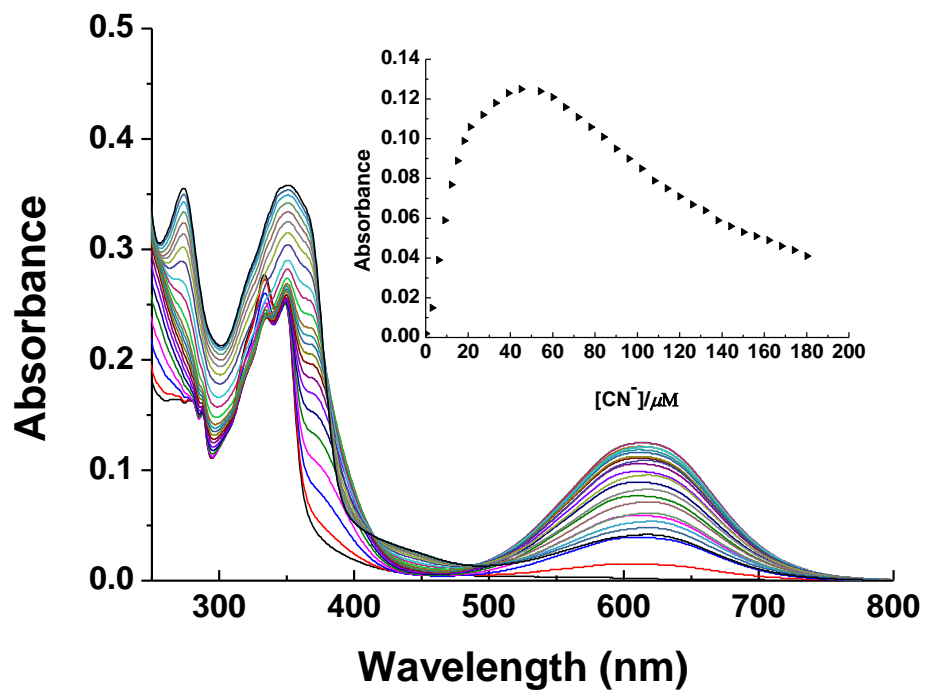

**Fig. S24.** UV-visible titration of 5 (20  $\mu\text{M}$ ) with  $\text{Bu}_4\text{N}^+\text{CN}^-$  in  $\text{CH}_3\text{CN}$ . The inset shows the absorbance at 610 nm as a function of  $[\text{CN}^-]$ .

10. UV-visible titration of 4 with  $\text{Bu}_4\text{N}^+\text{CN}^-$  in  $\text{CH}_3\text{CN}$ .

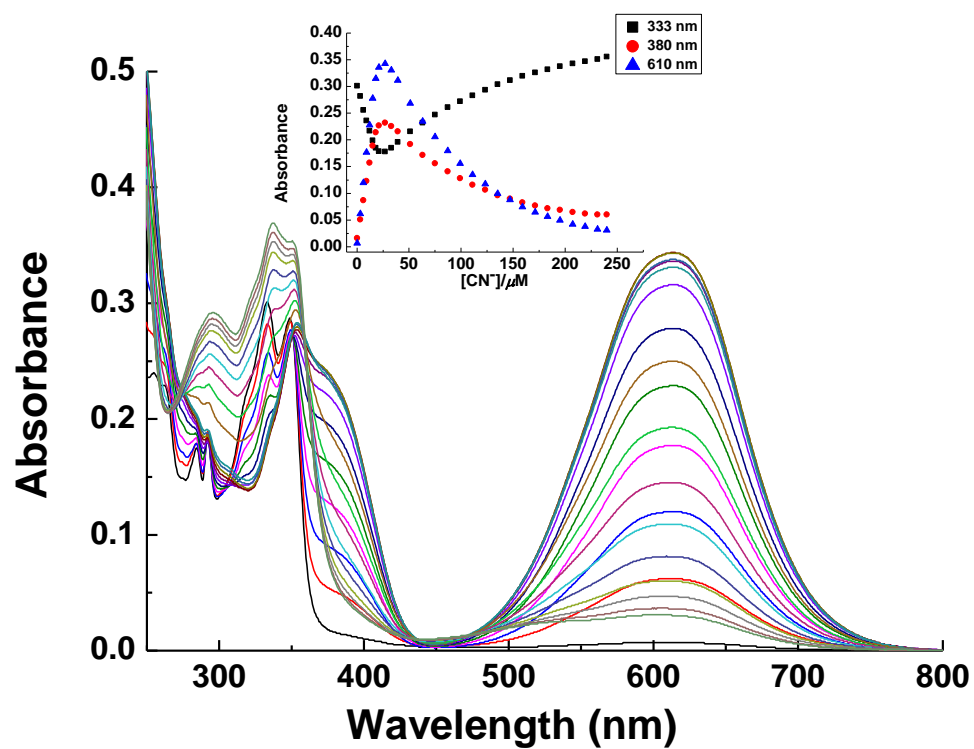

**Fig. S25.** UV-visible titration of 4 (20 μM) with  $\text{Bu}_4\text{N}^+\text{CN}^-$  in  $\text{CH}_3\text{CN}$ . The inset shows the absorbance at 333, 380 and 610 nm as a function of  $[\text{CN}^-]$ .

## 11. Fluorescence spectra of 5 in the presence of different anions in CH<sub>3</sub>CN.

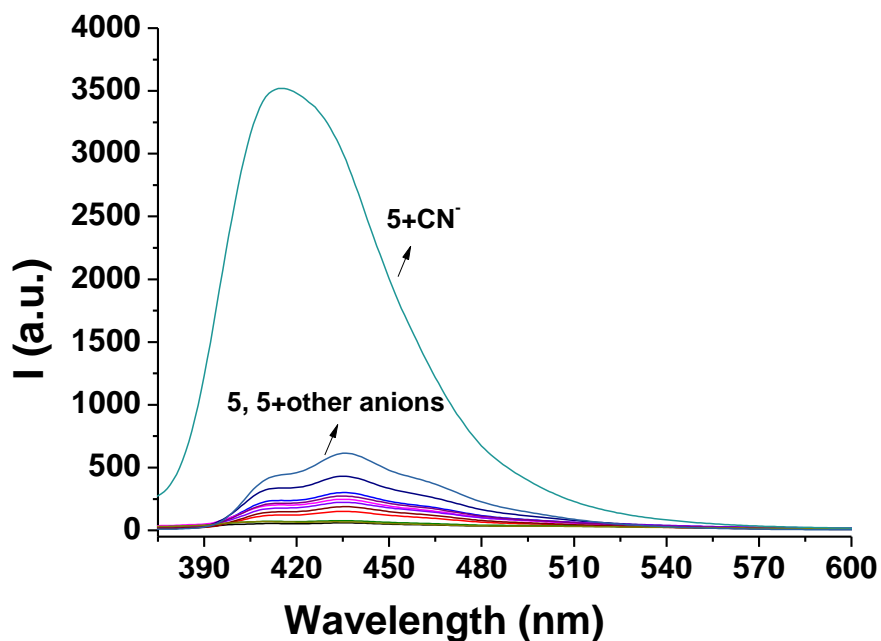

**Fig. S26.** Fluorescence spectra of 5 (20  $\mu$ M) in the presence of different anions (ca. 24 equiv) in CH<sub>3</sub>CN.

## 12. Comparative table of this sensor with others.

**Table S1.** Comparison of this sensor with others

|                                   | <b>Fluorescence<br/>change</b> | <b>Recognition site</b>                                                  |
|-----------------------------------|--------------------------------|--------------------------------------------------------------------------|
| J. Org. Chem. (2011) 76, 6962     | On-Off                         | Single: C=C double bonds                                                 |
| Org. Lett. (2006) 8, 5721         | On-Off                         | Single: C=C double bonds                                                 |
| Chem. Lett. (2011) 40, 623        | On-Off                         | Single: C=C double bonds                                                 |
| J. Org. Chem. (2009) 74, 7496     | On-Off                         | Single: C=N double bonds                                                 |
| Org. Lett. (2008) 10, 461         | On-Off                         | Single: C=O double bonds                                                 |
| Tetrahedron Lett. (2008) 49, 5544 | On-Off                         | Single: C=O double bonds                                                 |
| <b>This sensor</b>                | <b>Off-On</b>                  | <b>Dual deprotonation: CH<br/>(irreversible) and NH<br/>(reversible)</b> |

13. UV-visible titration of 7 with  $\text{Bu}_4\text{N}^+\text{CN}^-$  in  $\text{CH}_3\text{CN}$ .

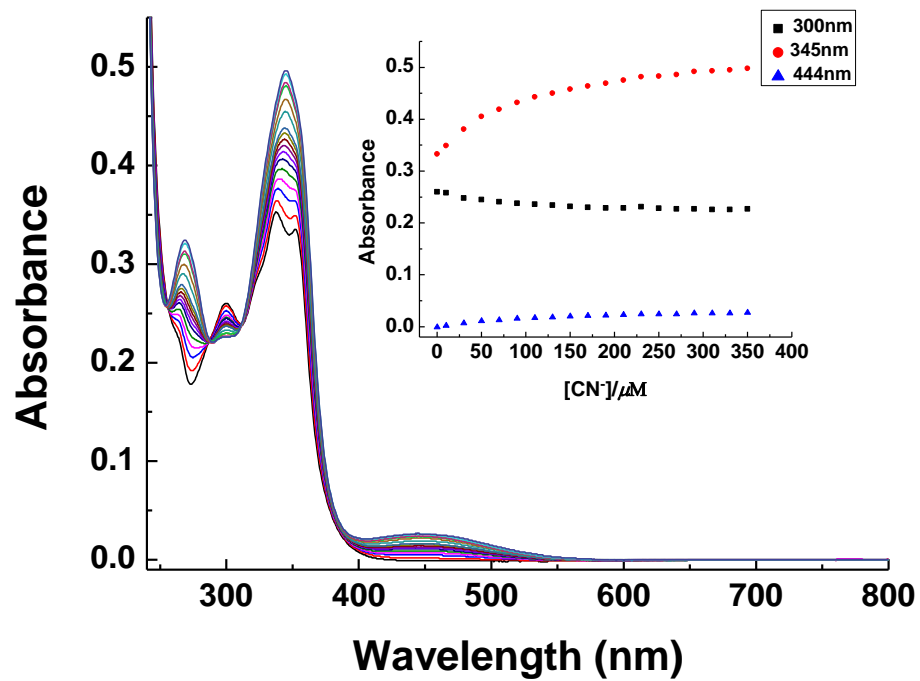

**Fig. S27.** UV-visible titration of 7 (20  $\mu\text{M}$ ) with  $\text{Bu}_4\text{N}^+\text{CN}^-$  in  $\text{CH}_3\text{CN}$ . The inset shows the absorbance at 300, 345 and 444 nm as a function of  $[\text{CN}^-]$ .

14. The fluorescence detection limit of probe 5 with  $\text{CN}^-$ .

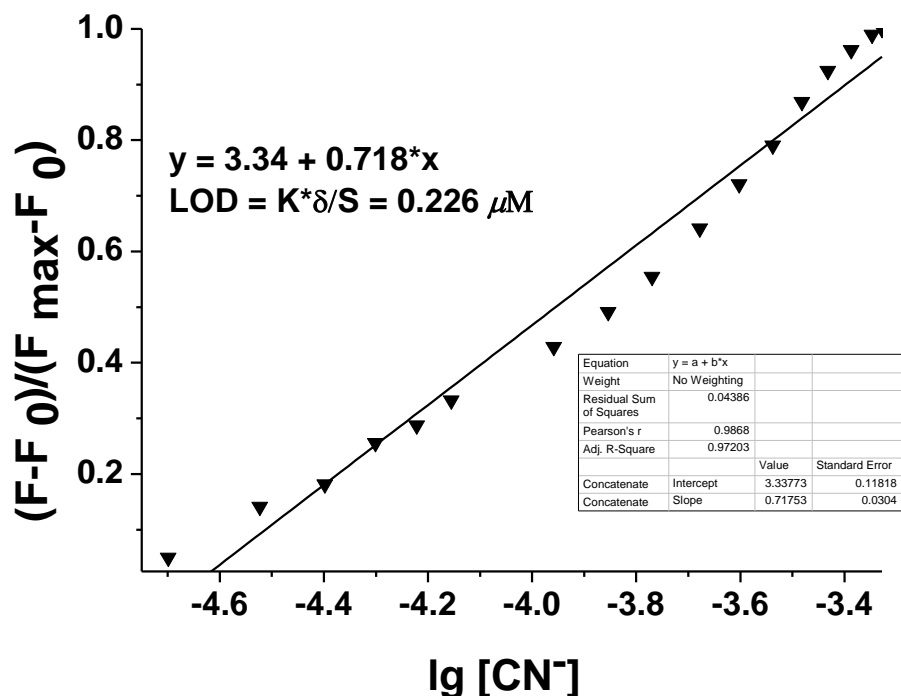

**Fig. S28.** Response of fluorescence intensity to changing  $\text{CN}^-$  concentrations in  $\text{CH}_3\text{CN}$ . ( $[\text{5}] = 20 \mu\text{M}$ ,  $[\text{CN}^-] = 5000 \mu\text{M}$ ,  $\lambda_{\text{ex}} = 353 \text{ nm}$ ,  $\lambda_{\text{em}} = 373 \text{ nm}$ ).

|         |    |
|---------|----|
| SD      | N  |
| 0.05407 | 16 |

The result of the analysis as follows:

Linear Equation :  $y = 3.34 + 0.718 * x$ ,  $R^2 = 0.97203$

$S = 7.18 * 10^5$ ,  $K = 3$ ,  $\delta = 0.05407$

$\text{LOD} = K * \delta/S = 0.226 \mu\text{M}$



15. Linear fluorescence response of probe 5 to  $\text{CN}^-$ .

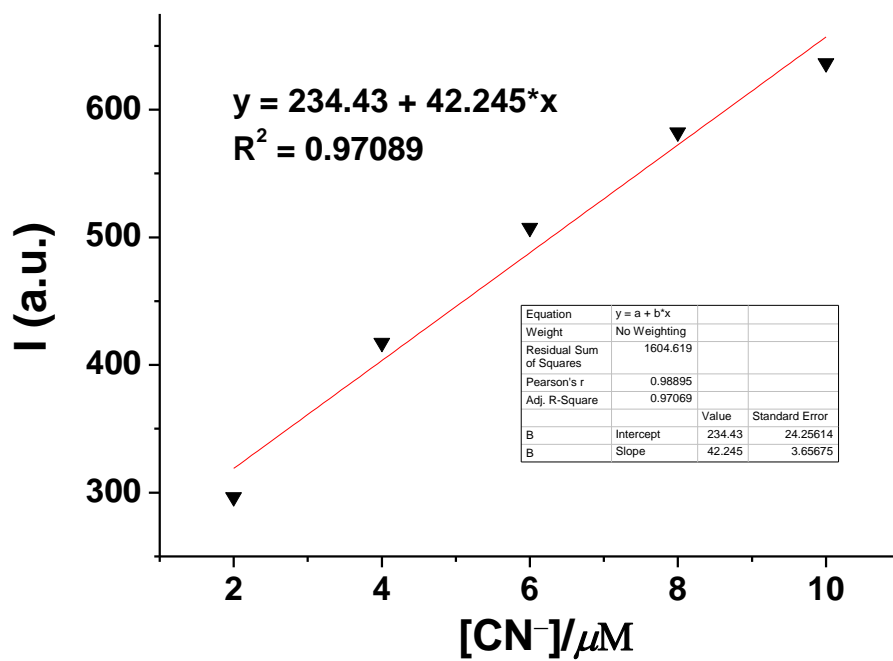

Fig. S29. Linear fluorescence response of probe 5 to  $\text{CN}^-$  concentration ranging from 0 to 10  $\mu\text{M}$ .

## 16. Fluorescence spectra of compound 5 with NaCN in mixture solvents

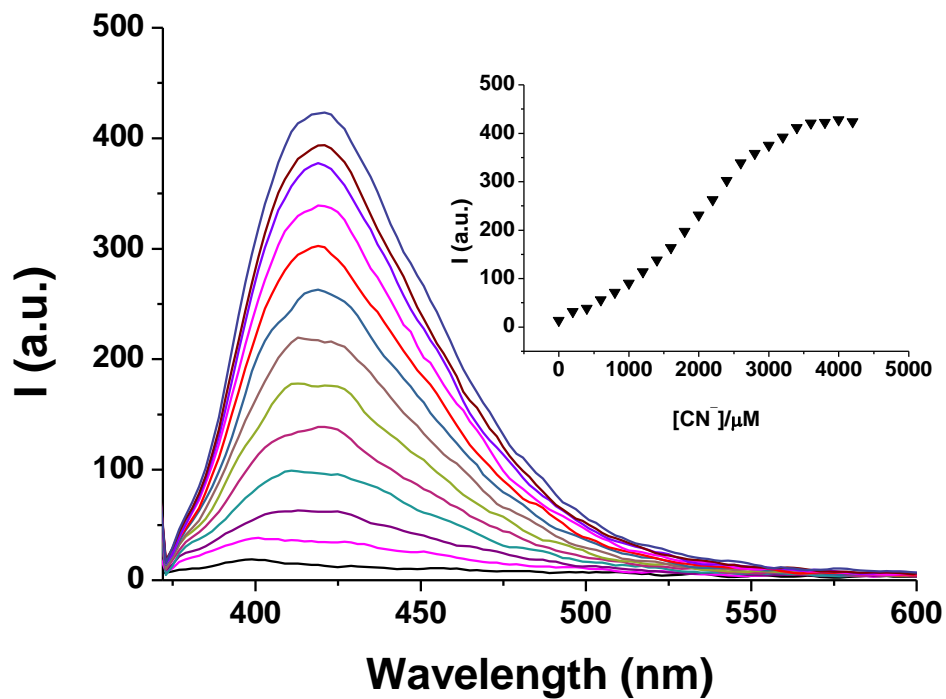

**Fig. S30.** Fluorescence spectra of compound **5** (20 μM) upon gradual addition of NaCN (0-200 equiv) in CH<sub>3</sub>CN/H<sub>2</sub>O (95/5; v/v) with excitation at 353 nm. Inset: Plot of fluorescence intensity ( $\lambda_{\text{ex}}=420\text{nm}$ ).

17. Fluorescence spectra of compound 5 with  $\text{Bu}_4\text{N}^+\text{CN}^-$  in mixture solvents

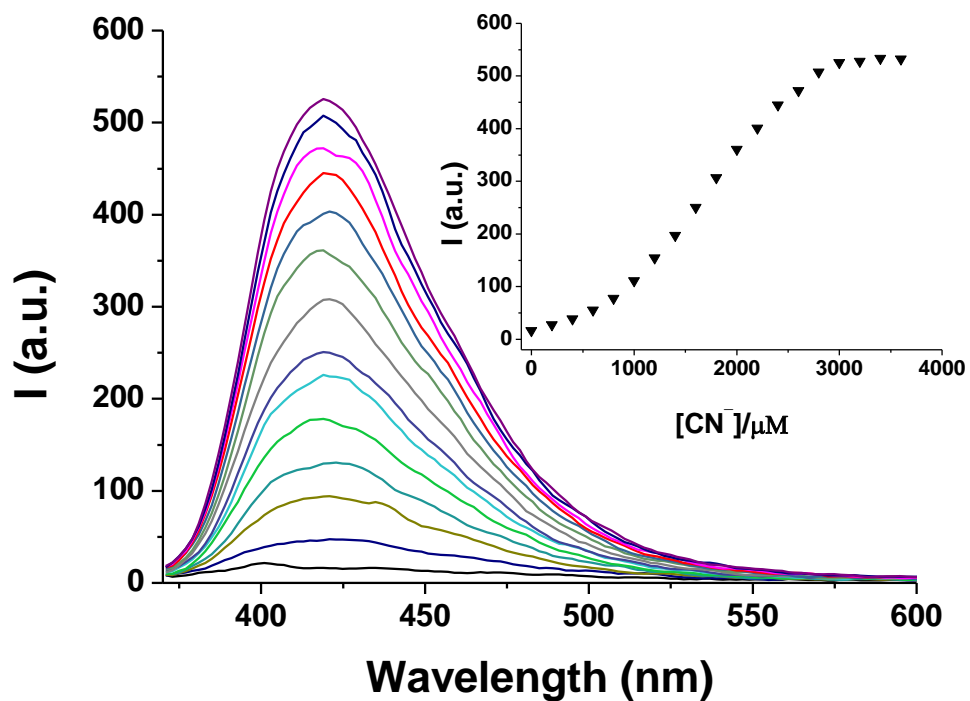

**Fig. S31.** Fluorescence spectra of compound 5 (20 μM) upon gradual addition of  $\text{Bu}_4\text{N}^+\text{CN}^-$  (0-200 equiv) in  $\text{CH}_3\text{CN}/\text{H}_2\text{O}$  (95/5; v/v) with excitation at 353 nm. Inset: Plot of fluorescence intensity ( $\lambda_{\text{ex}}=420\text{nm}$ ).

18. The pH-dependent behaviour of the probe 5 in different pH values.

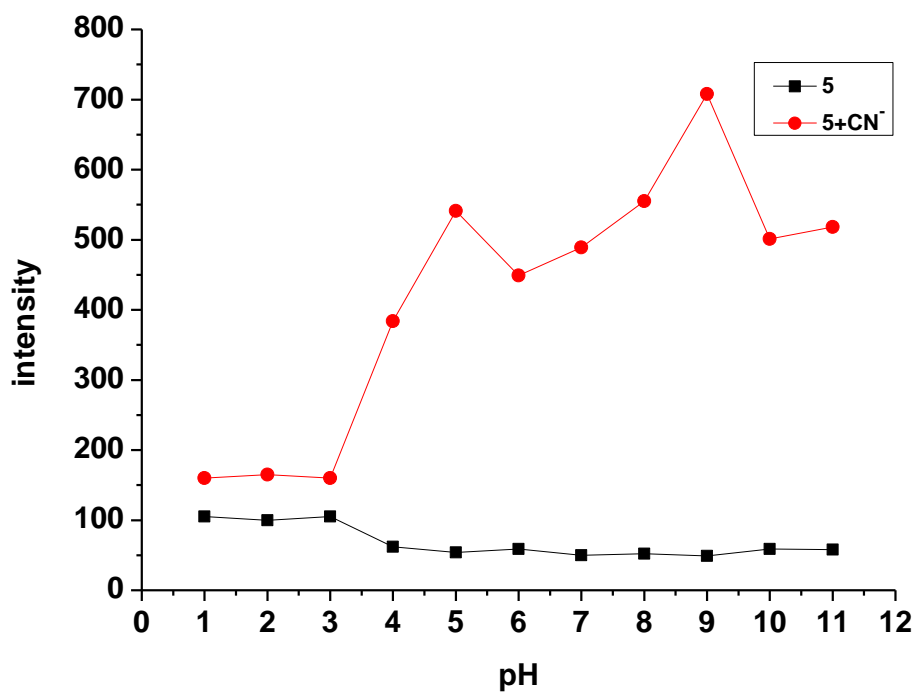

**Fig. S32** Before and after the addition of cyanide ions respectively, the effect of pH on the fluorescence responses (415 nm) of **5** (20  $\mu$ M) in CH<sub>3</sub>CN/H<sub>2</sub>O (9:1, v/v). The pH of solution was adjusted by aqueous solution of NaOH (aq, 1 M) or HCl (aq, 1 M);  $\lambda_{ex}$  = 353 nm.

19. Confocal microscopic images of RAW 264.7 Macrophages cells

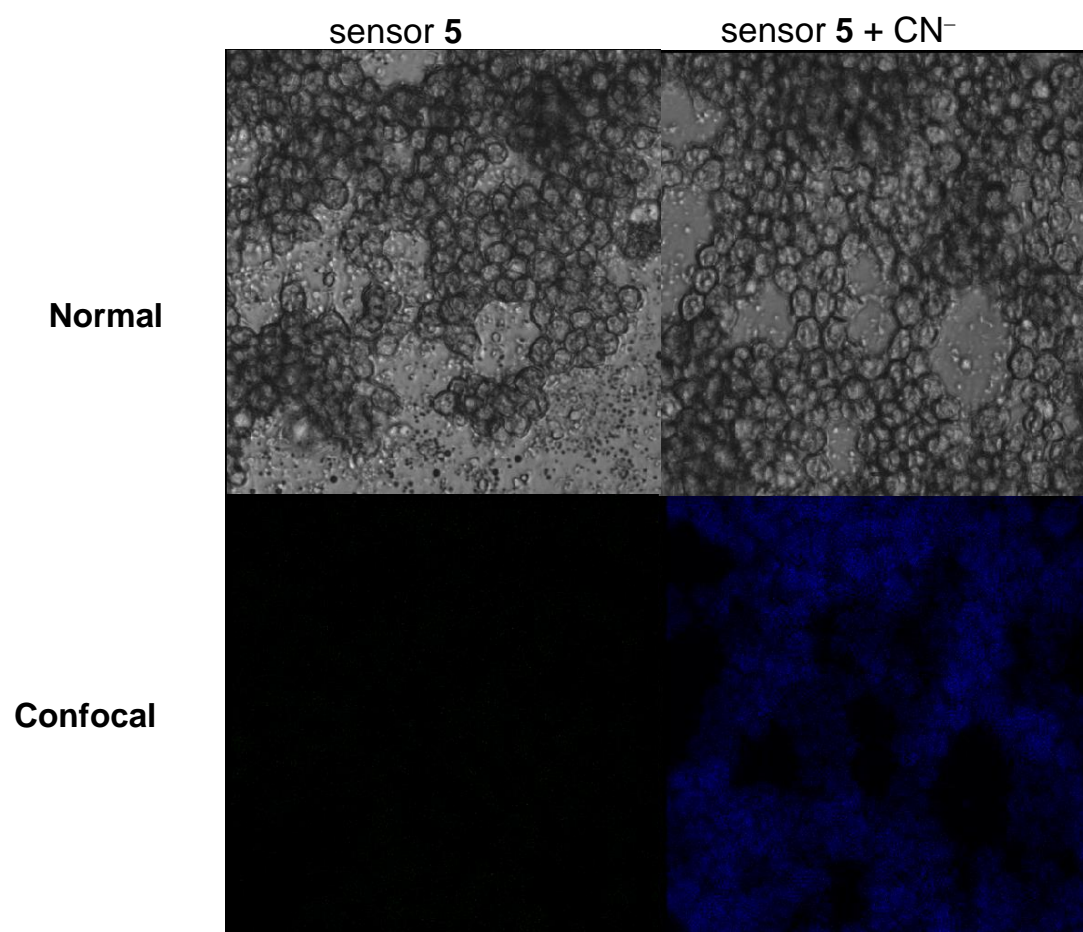

**Fig. S33.** Confocal fluorescence microscope images of RAW 264.7 Macrophages cells in the presence of sensor **5** ( $100\ \mu\text{M}$ ). The fluorescence images were recorded after 10 min of treatment of CN<sup>-</sup> ( $100\ \mu\text{M}$ ) at  $37\ ^\circ\text{C}$ .

20. The detailed  $^1\text{H}$  NMR titration of **7** and **5** with  $\text{F}^-$  (6–10 ppm)

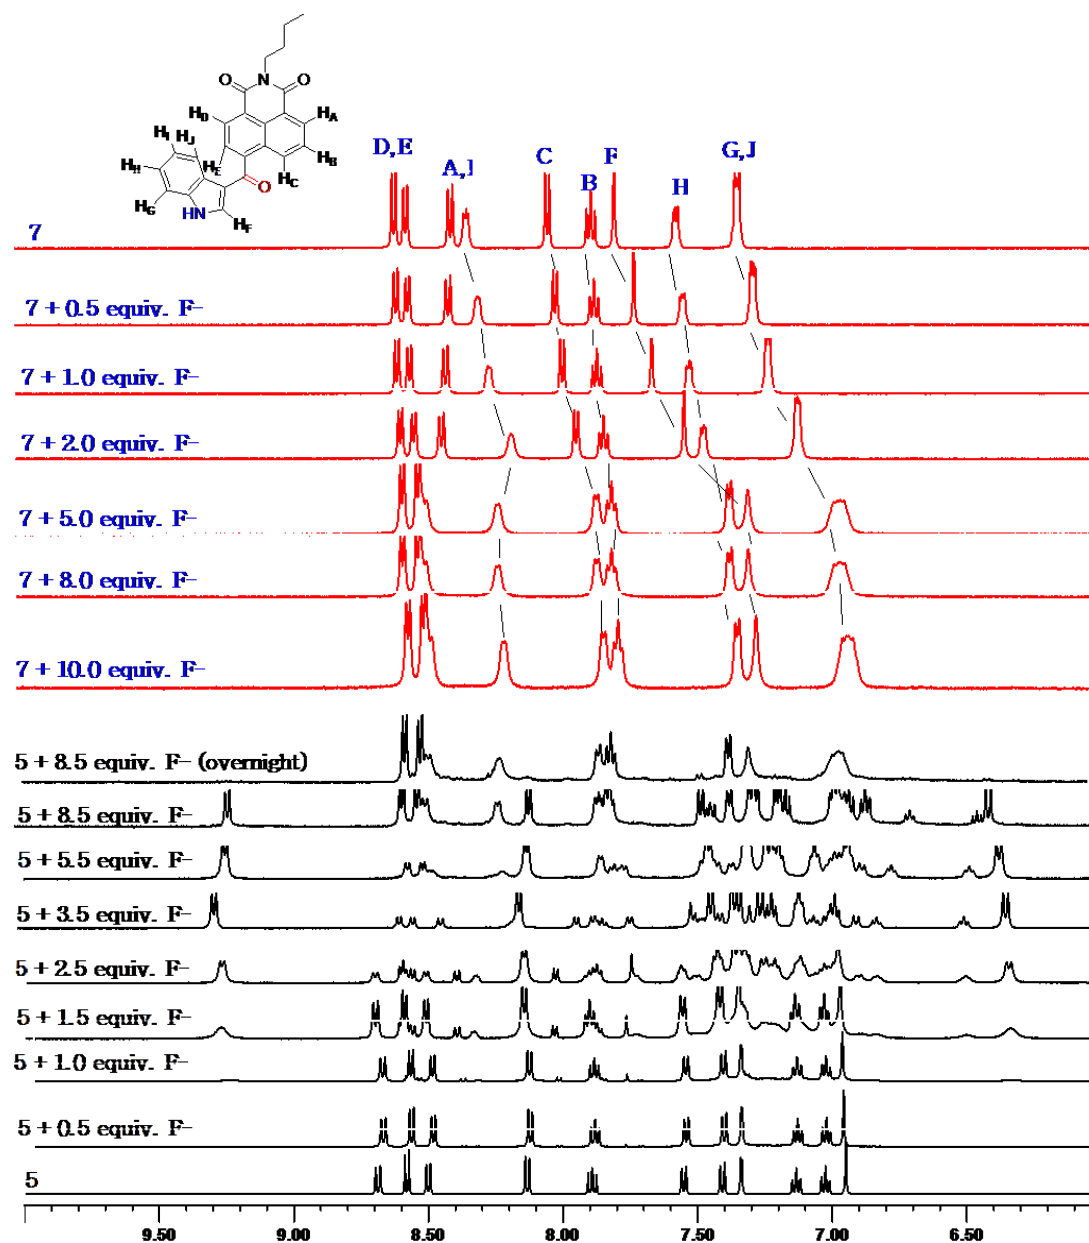

Fig. S34. Plots of  $^1\text{H}$  NMR spectra of **7** (red) and **5** (black) on addition of  $\text{F}^-$  in  $\text{DMSO}-d_6$  (expanded the region of 6–10 ppm).

## 21. The $^1\text{H}$ NMR titration of **5** with $\text{CN}^-$

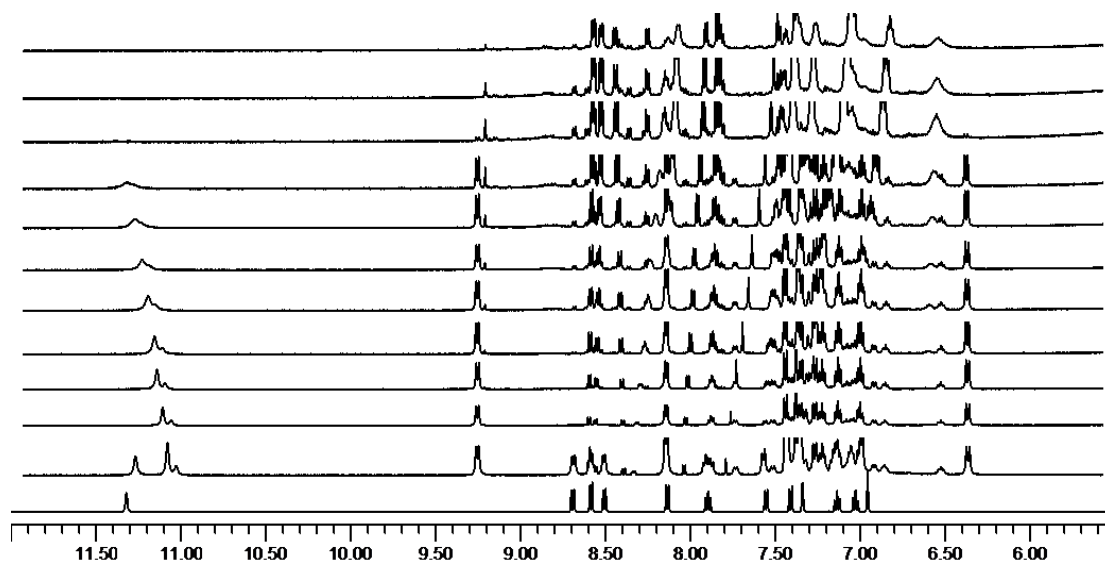

**Fig. S35.** Plots of  $^1\text{H}$  NMR spectra of **5** (red,  $3.0 \times 10^{-2}$  mol/L) on addition of  $\text{CN}^-$  in  $\text{DMSO-}d_6$  (from bottom to top,  $\text{CN}^-$  equiv. = 0, 1.0, 2.0, 3.0, 4.0, 5.0, 6.0, 7.0, 9.0, 11.0 (overnight), 11.0 (after 24 hours).

## 22. The $^1\text{H}$ NMR titration of **7** with $\text{CN}^-$

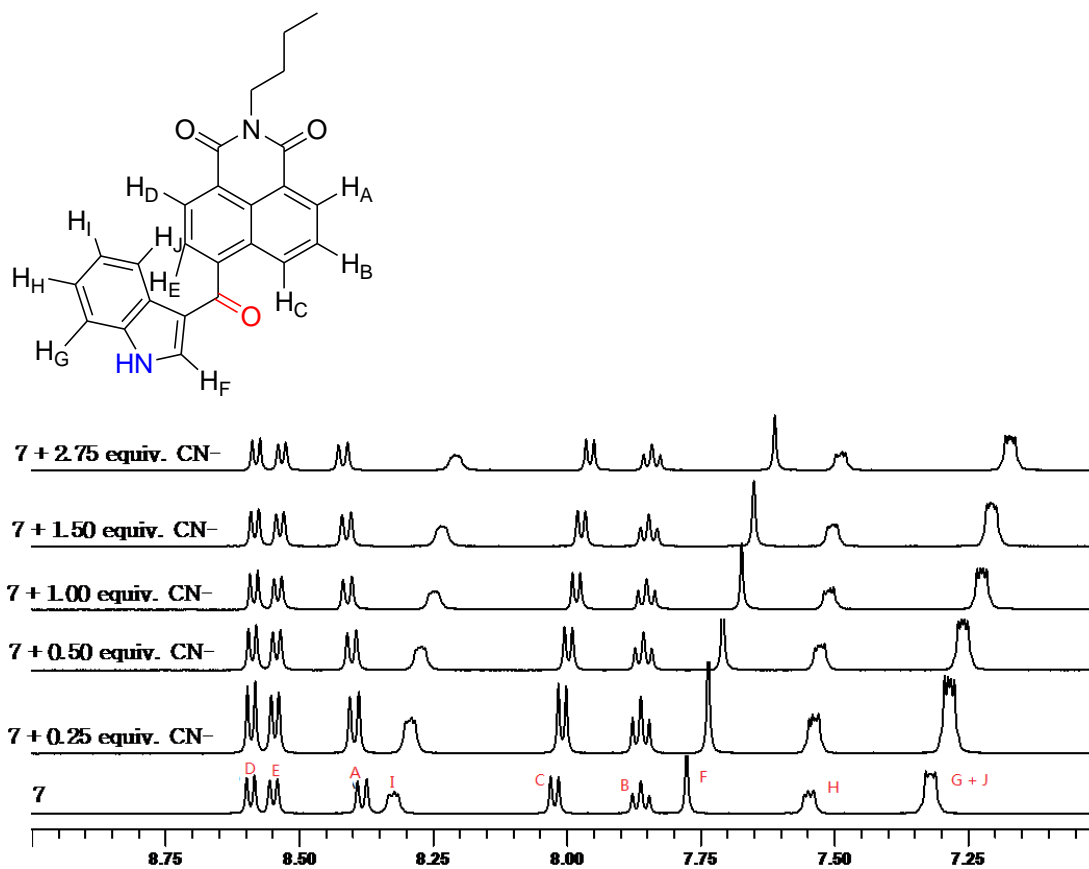

Fig. S36. Plots of  $^1\text{H}$  NMR spectra of **7** ( $3.0 \times 10^{-2}$  mol/L) on addition of  $\text{CN}^-$  in  $\text{DMSO-}d_6$ .



23. The final state of compound 5 and 7 with  $F^-$  and  $CN^-$ .

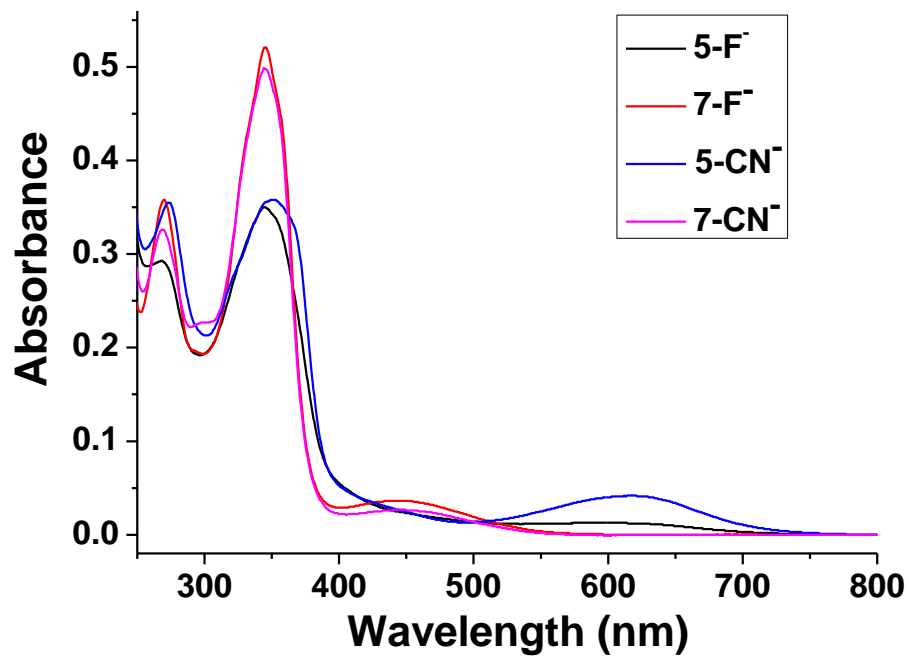

Fig. S37. UV-vis spectra of 5 and 7 after addition of  $F^-$  and  $CN^-$  in  $CH_3CN$  (The final state).
